1 Multiple lineages of *Streptomyces* produce antimicrobials within passalid  
2 beetle galleries across eastern North America

3

4 Rita de Cassia Pessotti<sup>a</sup>, Bridget L. Hansen<sup>a</sup>, Jewel N. Reaso<sup>a</sup>, Javier A. Ceja-Navarro<sup>cd</sup>, Laila El-Hifnawi<sup>b</sup>,  
5 Eoin L. Brodie<sup>ef</sup>, and Matthew F. Traxler<sup>\*a</sup>

6

7

8 <sup>a</sup>Department of Plant and Microbial Biology, University of California, Berkeley, CA, USA

9 <sup>b</sup>Department of Molecular and Cellular Biology, University of California, Berkeley, CA, USA

10 <sup>c</sup>Bioengineering and Biomedical Sciences Department, Biological Systems and Engineering Division,  
11 Lawrence Berkeley National Laboratory, Berkeley, CA, USA

12 <sup>d</sup>Institute for Biodiversity Science and Sustainability, California Academy of Sciences, Berkeley, CA, USA

13 <sup>e</sup>Ecology Department, Earth and Environmental Sciences, Lawrence Berkeley National Laboratory,  
14 Berkeley, CA, USA

15 <sup>f</sup>Department of Environmental Science, Policy and Management, University of California, Berkeley, CA,  
16 USA

17

18

19

20

21 \* Matthew F. Traxler

22 **Email:** mtrax@berkeley.edu

23

24

25

26

27

28 **Keywords:** Chemical ecology, symbiosis, *Odontotaenius disjunctus*, natural products, bessbug.

29 **ABSTRACT**

30

31 Some insects form symbioses in which actinomycetes provide defense against pathogens by making  
32 antimicrobials. The range of chemical strategies employed across these associations, and how these  
33 strategies relate to insect lifestyle, remains underexplored. We assessed subsocial passalid beetles of the  
34 species *Odontotaenius disjunctus*, and their frass (fecal material) which is an important food resource within  
35 their galleries, as a model insect/actinomycete system. Through chemical and phylogenetic analyses, we  
36 found that *O. disjunctus* frass collected across eastern North America harbored multiple lineages of  
37 *Streptomyces* and diverse antimicrobials. Metabolites detected in frass displayed synergistic and  
38 antagonistic inhibition of a fungal entomopathogen, *Metarhizium anisopliae*, and multiple streptomycete  
39 isolates inhibited this pathogen when co-cultivated directly in frass. These findings support a model in which  
40 the lifestyle of *O. disjunctus* accommodates multiple *Streptomyces* lineages in their frass, resulting in a rich  
41 repertoire of antimicrobials that likely insulates their galleries against pathogenic invasion.

## 42 INTRODUCTION

43 The majority of clinically-used antibiotics continue to be based on chemical scaffolds derived from  
44 natural products (also known as specialized metabolites) made by microbes, namely actinomycete bacteria  
45 and filamentous fungi (Chevrette & Currie, 2019; Gholami-Shabani et al., 2019; Hutchings et al., 2019; Lyu  
46 et al., 2020). However, the spread of resistance among pathogens has led to a steep, and well-documented,  
47 erosion in antibiotic efficacy (Colavecchio et al., 2017; Lekshmi et al., 2017; Richardson, 2017). The rapidity  
48 of resistance evolution in the medical arena raises questions about how the microbes that make antibiotics  
49 preserve their advantageous use over evolutionary time, and underscores a need to understand the  
50 chemical ecology of microbially-produced specialized metabolites.

51 Symbiotic systems in which actinomycete-derived specialized metabolites are used for chemical  
52 defense may provide a blueprint for effectively leveraging antibiotics over long-term timescales. Important  
53 examples of such systems include the symbiotic relationships between insects and actinomycetes, in which  
54 the insects associate with actinomycetes to protect their food sources, communal nests, or developing larva  
55 against pathogenic invasion (Bratburd et al., 2020; Chevrette et al., 2019; Li et al., 2018; Van Arnam et al.,  
56 2018). Among the most extensively characterized of these systems are the eusocial, neotropical leaf-cutter  
57 ants, who cultivate a food fungus on leaf tissue in their subterranean nests. These ants protect their fungal  
58 gardens from a pathogenic fungus (*Escovopsis* sp.) by associating with actinomycetes usually belonging  
59 to the genus *Pseudonocardia*, which produce a variety of antifungal molecules (e.g. dentigerumycin and  
60 gerumycins) that differentially inhibit the growth of the *Escovopsis* sp. (Currie et al., 2003; Li et al., 2018;  
61 Menegatti et al., 2020; Oh et al., 2009; Sit et al., 2015; Van Arnam et al., 2016). Similarly, the gregarious  
62 southern pine beetle, which cultivates fungi to feed its larvae, maintains *Streptomyces* sp. capable of  
63 inhibiting fungal pathogens (Scott et al., 2008). Another archetypal insect/actinomycete system includes  
64 the solitary beewolf wasps, which harbor *Streptomyces philanthi* in specialized antennal reservoirs  
65 (Kaltenpoth et al., 2005, 2010, 2012). Female beewolves inoculate their brood chambers with these  
66 symbionts, which are ultimately incorporated into the cocoons of their pupating larvae (Kaltenpoth et al.,  
67 2005). These *Streptomyces* produce a suite of antifungal molecules (piericidins and derivatives,  
68 streptochlorins, and nigericin) that protect the brood from opportunistic fungal pathogens (Engl et al., 2018;  
69 Kroiss et al., 2010).

70 The exploration of these insect/actinomycete associations has provided key insights into the ecology  
71 of microbial specialized metabolites. Importantly, analyses of the leafcutter ant and beewolf systems have  
72 shown the co-evolution of the insect hosts and actinomycete symbionts, suggesting that these relationships,  
73 and the molecules involved, have remained durable over tens of millions of years (Kaltenpoth et al., 2014;  
74 Li et al., 2018). Both leafcutter ants and beewolves have specialized structures for maintaining their  
75 actinomycete symbionts, which facilitate vertical transmission and high symbiont fidelity (Kaltenpoth et al.,  
76 2005; Li et al., 2018; Stubbendieck et al., 2019). However, outstanding questions remain regarding the  
77 nature of actinomycete symbioses in other insects, e.g. those without specialized compartments for  
78 maintaining bacterial symbionts. Specifically, how do different mechanisms of microbial transmission  
79 influence symbiont specificity and diversity? And, what are the implications of symbiont specificity/diversity  
80 for the chemical repertoires found in these systems? Thus, we were motivated to identify an  
81 insect/actinomycete association that i) utilized a different mechanism of microbial transmission, and ii)  
82 enabled direct detection of microbially-produced specialized metabolites *in situ*.

83 With this in mind, we assessed *Odontotaenius disjunctus*, a subsocial passalid beetle commonly found  
84 in decomposing logs across eastern North America, and its frass (fecal material), as a model system for  
85 studying the ecology of actinomycete specialized metabolism. Frass is an abundant and easily sampled  
86 material in *O. disjunctus* galleries, and it is an important nutrient source in this system for both adult and  
87 larval survival, and pupal chamber construction (Biedermann & Nuotclà, 2020; Mason & Odum, 1969;  
88 Schuster & Schuster, 1985; Valenzuela-González, 1992). Notably, *O. disjunctus* does not appear to have  
89 mycangia or other specialized structures that harbor microbial symbionts (M. D. Ulyshen, 2018). While *O.*  
90 *disjunctus* has not been investigated for the presence of actinomycetes and antimicrobials, a previous study  
91 on tropical passalid beetles found a diverse community of actinomycetes inhabiting the gut of both adults  
92 and larvae (Vargas-Asensio et al., 2014).

93 We characterized this system through a combination of i) direct chemical analyses of microbial  
94 specialized metabolites in frass sampled from *O. disjunctus* galleries across its geographic range, ii) parallel  
95 assessment of the phylogeny and specialized metabolite repertoire of actinomycete strains isolated from  
96 frass, iii) investigation of synergism/antagonism between the specialized metabolites found in frass against  
97 a beetle pathogen, and iv) direct assessment of competitive interactions between key *Streptomyces* isolates

98 and entomopathogenic strains in an *in vitro* frass experimental system. Collectively, our results indicate that  
99 *O. disjunctus* establish stable associations with a comparatively diverse set of actinomycetes relative to  
100 other insect/actinomycete associations, which we propose to be a result of microbial transmission via  
101 coprophagy. This set of actinomycetes and their antimicrobials likely aid in gallery hygiene and  
102 consequently protect both an important nutrient source for *O. disjunctus* and their pupae. Furthermore, our  
103 findings demonstrate that the *O. disjunctus*/actinomycete system represents a tractable system for  
104 exploration of actinomycete specialized metabolism at multiple scales, ranging from macroscale  
105 biogeography *in natura* to interactions of microbes at microscopic scales *in vitro*.

## 106 RESULTS

### 107 Actinomycetes with antimicrobial properties are widespread in *O. disjunctus* galleries

108 Passalid beetles of the species *Odontotaenius disjunctus* (formerly known as *Passalus cornutus*, and  
109 commonly referred to as ‘bessbugs’, **Figure 1A**) are widely distributed across eastern North America, where  
110 they are important decomposers of rotting timber (Ceja-Navarro et al., 2014, 2019; Gray, 1946; Pearse et  
111 al., 1936). This role has prompted interest in the *O. disjunctus* gut microbiota as a potential source of  
112 lignocellulose-processing microbes for biofuel efforts (Ceja-Navarro et al., 2014, 2019; Nguyen et al., 2006;  
113 Suh et al., 2003, 2005; Urbina et al., 2013). *O. disjunctus* is subsocial, with mating pairs establishing  
114 galleries within decaying logs where they rear their larvae (Schuster & Schuster, 1985; Wicknick & Miskelly,  
115 2009). Large amounts of beetle frass accumulate within these galleries (**Figure 1B**). *O. disjunctus* is also  
116 coprophagic, and it is thought that microbes within frass continue digesting plant material as a kind of  
117 ‘external rumen’ between periods of consumption by the beetles (Biedermann & Nuotclà, 2020; Mason &  
118 Odum, 1969; M. D. Ulyshen, 2018; Valenzuela-González, 1992). The frass is also notable, as the adults  
119 feed it to the larvae, and parents and teneral siblings construct chambers from frass around  
120 metamorphosing pupa (Biedermann & Nuotclà, 2020; Gray, 1946; Schuster & Schuster, 1985; Valenzuela-  
121 González, 1992) (**Figure 1C**). Given the high nutrient content of frass, and the complex parental behaviors  
122 associated with it, we drew parallels between this system and the other insect/actinomycete systems  
123 described above. Thus, we hypothesized that *O. disjunctus* galleries, and frass specifically, might contain  
124 actinomycete symbionts that have the potential to provide chemical defense to their host galleries and the  
125 food source on which their brood subsist.

126 To investigate if actinomycetes were associated with *O. disjunctus* galleries, we sampled material from  
127 22 galleries across eastern North America (**Figure 1E, Supplementary File 1A - Table S1**). Samples  
128 included freshly produced frass from live beetles and larvae (as an indicator of their microbial gut content),  
129 and frass and wood from within the galleries. Pupal chamber material was also sampled when available  
130 and in this case, pupae were also gently sampled with a swab. Using two selective media to enrich for  
131 actinomycetes, we isolated 339 bacterial strains (**Supplementary File 1B - Table S2**) and assayed their  
132 ability to inhibit growth of the Gram-positive bacterium *Bacillus subtilis* and the fungal pathogen *Candida*  
133 *albicans*. We found that the frequency of bioactivity was high among these isolates. Specifically, 76.1% of

134 the collection displayed activity against *B. subtilis* and/or *C. albicans* (**Figure 1D, Supplementary File 1B**  
135 **- Table S2**), with 48.7% inhibiting both. The prevalence of actinomycetes displaying antimicrobial activity  
136 *in vitro* suggested that the *O. disjunctus*/actinomycete system might represent a rich environment for  
137 chemical ecology studies.

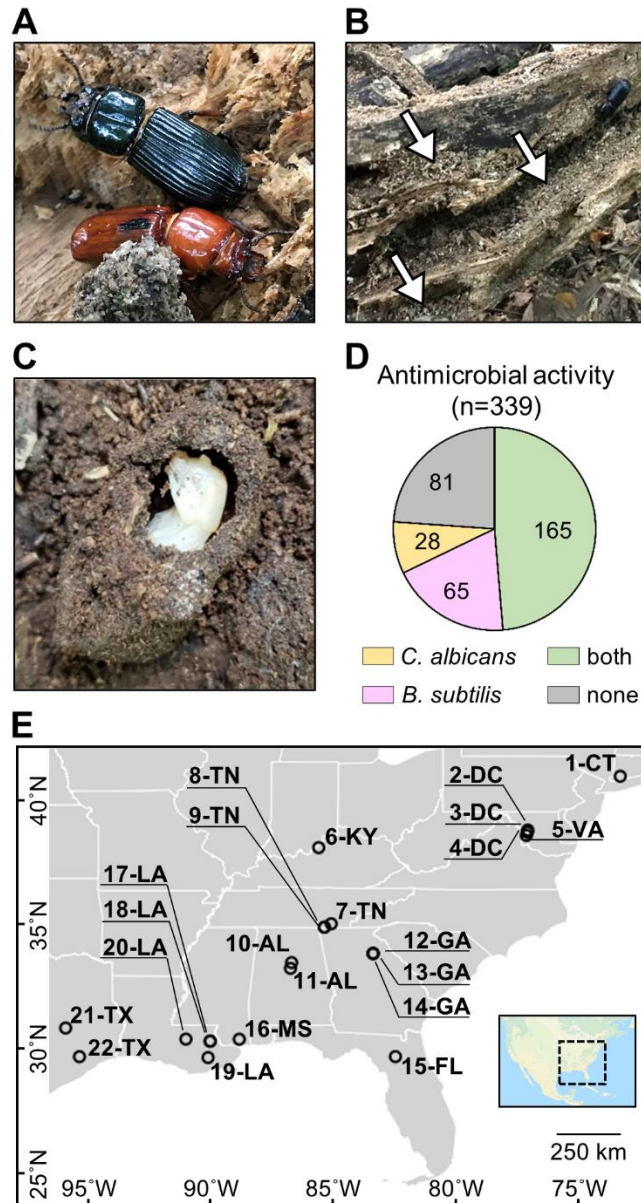

138  
139

140 **Figure 1:** *O. disjunctus* beetles (**A**) inhabit and feed on decomposing logs. They build galleries that are  
141 filled with frass (**B**), which is a central material in this system. This material is also used to build pupal  
142 chambers (**C**). We sampled 22 galleries across 11 states (**E**), and isolated actinomycetes from all samples.  
143 This actinomycete collection showed a high rate of antimicrobial activity against *B. subtilis* and/or *C.*  
144 *albicans* (**D**). Each gallery is represented on the map by a circle with the gallery code next to it. CT:  
145 Connecticut, DC: District of Columbia, VA: Virginia, KY: Kentucky, TN: Tennessee, GA: Georgia, FL:  
146 Florida, AL: Alabama, MS: Mississippi, LA: Louisiana, TX: Texas.

## 147 ***In situ* detection of microbial specialized metabolites**

148 Next, we asked if specialized metabolites produced by actinomycetes could be detected directly in  
149 material from *O. disjunctus* galleries. To do so, we extracted frass and pupal chamber material with ethyl  
150 acetate, and analyzed the extracts using liquid chromatography coupled with high-resolution tandem mass  
151 spectrometry (LC-MS/MS). Surprisingly, we detected a wide array of microbial specialized metabolites in  
152 frass/pupal chamber material with identification levels of 1, 2, or 3 (see **Supplementary File 1C - Table**  
153 **S3**, and Materials and Methods for identification criteria). Specifically, we detected 15 compounds which  
154 were grouped into seven distinct compound families based on high structural similarities (i.e. when analogs  
155 were grouped): the actinomycins D and X<sub>2</sub> (**1, 2**), the angucyclinones STA-21 and rubiginone B2 (**3, 4**),  
156 cycloheximide (**5**), the nactins monactin, dinactin, trinactin, and tetranactin (**7-10**); the polyene macrolides  
157 filipin III, filipin IV, and fungichromin (**13-15**), the polycyclic tetramate macrolactams (PTMs) alteramides A  
158 and B (**16, 17**), and piericidin A (**24**) (**Figure 2A**; **Supplementary Files 1C - Table S3, 1D - Table S4**;  
159 **Appendix 1 - Figure 4**).

160 All of these families of compounds are known to be produced by actinomycetes and to have  
161 antimicrobial properties (Gao et al., 2014; Hollstein, 1974; Kominek, 1975; Mevers et al., 2017; Moree et  
162 al., 2014; Oka et al., 1990; Olano et al., 2014; Ortega et al., 2019; Protasov et al., 2017; Shih et al., 2003;  
163 Song et al., 2005; Taniguchi et al., 2002; Urakawa et al., 1996; Zizka, 1998). The average number of  
164 compound families detected per gallery was ~2.3, with only one gallery containing no detectable  
165 compounds, and four galleries containing four or five compound families (**Figure 2B**). Four families of  
166 compounds were detected in the pupal chamber material collected from gallery 17-LA: actinomycins,  
167 angucyclinones, polyene macrolides, and nactins. Interestingly, we also detected beauvericin, a compound  
168 with known insecticidal activity (Q. Wang & Xu, 2012), in nearly half of the galleries (**Figure 2C**). Beauvericin  
169 is known to be produced by fungal entomopathogens like *Beauveria* spp. and *Fusarium* spp. (Hamill et al.,  
170 1969; Logrieco et al., 1998). Together, these results indicate that frass in *O. disjunctus* galleries commonly  
171 contains multiple types of antimicrobials produced by actinomycetes, and multiple antimicrobial molecules  
172 are found across the expansive geographic range of *O. disjunctus*. Beyond this, a molecule commonly  
173 produced by entomopathogenic fungi is also widespread in frass.



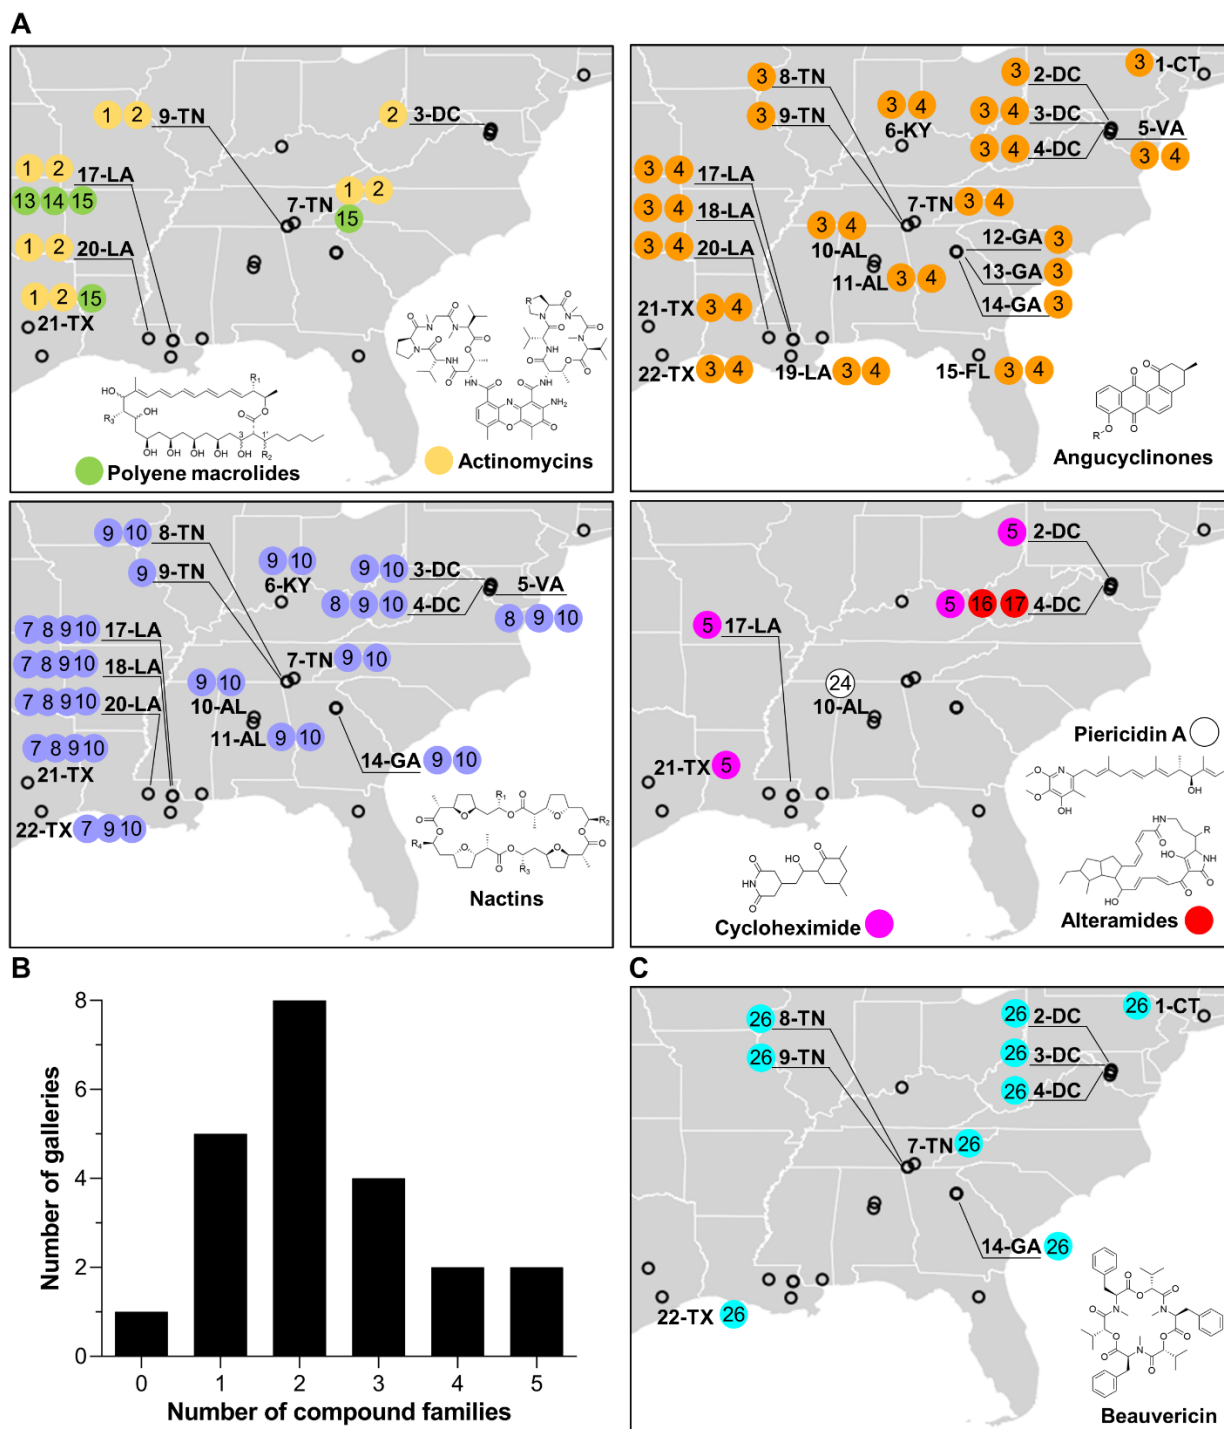

174

175 **Figure 2:** Geographical distribution of specialized metabolite families detected in frass material from wild  
 176 beetle galleries. **A)** Distribution of bacterially produced compounds. **B)** Number of galleries in which 0-5  
 177 families of bacterially produced compounds were detected. **C)** Distribution of beauvericin, a fungal  
 178 metabolite. Numbers in circles represent the numeric code of each compound: Actinomycin D (1),  
 179 Actinomycin X2 (2), STA-21 (3), Rubiginone B2 (4), Cycloheximide (5), Monactin (7), Dinactin (8), Trinactin  
 180 (9), Tetranactin (10), Alteramide A (16), Alteramide B (17), Piericidin A (24), Beauvericin (26). Each gallery  
 181 is represented on the map by a circle with the gallery code next to it. CT: Connecticut, DC: District of  
 182 Columbia, VA: Virginia, KY: Kentucky, TN: Tennessee, GA: Georgia, FL: Florida, AL: Alabama, MS:  
 183 Mississippi, LA: Louisiana, TX: Texas.

184 **Actinomycetes associated with *O. disjunctus* frass produce structurally diverse metabolites *in vitro***

185 We next sought to identify compounds produced by actinomycetes in our isolate library, with the dual  
186 goals of i) identifying organisms that produce the metabolites seen *in situ* for further investigation, and ii)  
187 characterizing the chemical patterns across the isolates. To do so, we performed extractions from all the  
188 actinomycete cultures that produced zones of inhibition larger than 2 mm (a total of 161 strains) using ethyl  
189 acetate, and submitted the crude extracts to LC-MS/MS analysis. Beyond the seven compound families  
190 detected *in situ*, we also identified isolates that produced antimycin A (**18**); the siderophore nocardamine  
191 (**19**), bafilomycins A1 and B1 (**20, 21**), novobiocin (**22**), surugamide A (**23**), and nigericin (**25**) (see  
192 **Supplementary File 1E - Table S5** and **Appendix 1 - Figures 1-3** for details on the identification of  
193 individual compounds). With the exception of nocardamine, these compounds are also considered  
194 antimicrobials (Kirby et al., 1956; Mahmoudi et al., 2006; Poulsen et al., 2011; Xu et al., 2017). Other  
195 possible members of the actinomycins, angucyclinones, antimycins, PTMs, and surugamides were also  
196 detected, based only on similarities in the fragmentation pattern and exact mass (e.g. frontalamides,  
197 maltophilins, rubiginones). In total, we identified 25 compounds representing twelve distinct antimicrobial  
198 families plus one siderophore compound. We note that fourteen of the compounds we identified here have  
199 been previously described to be produced by microbes associated with other insects (Benndorf et al., 2018;  
200 Blodgett et al., 2010; Engl et al., 2018; Grubbs et al., 2020; Jiang et al., 2018; Kroiss et al., 2010; Mevers  
201 et al., 2017; Ortega et al., 2019; Poulsen et al., 2011; Schoenian et al., 2011; Seipke et al., 2011) (**Figure**  
202 **3**). Collectively, these results reinforce the findings above that *O. disjunctus* frass plays host to  
203 actinomycetes that produce a rich array of antimicrobial compounds.

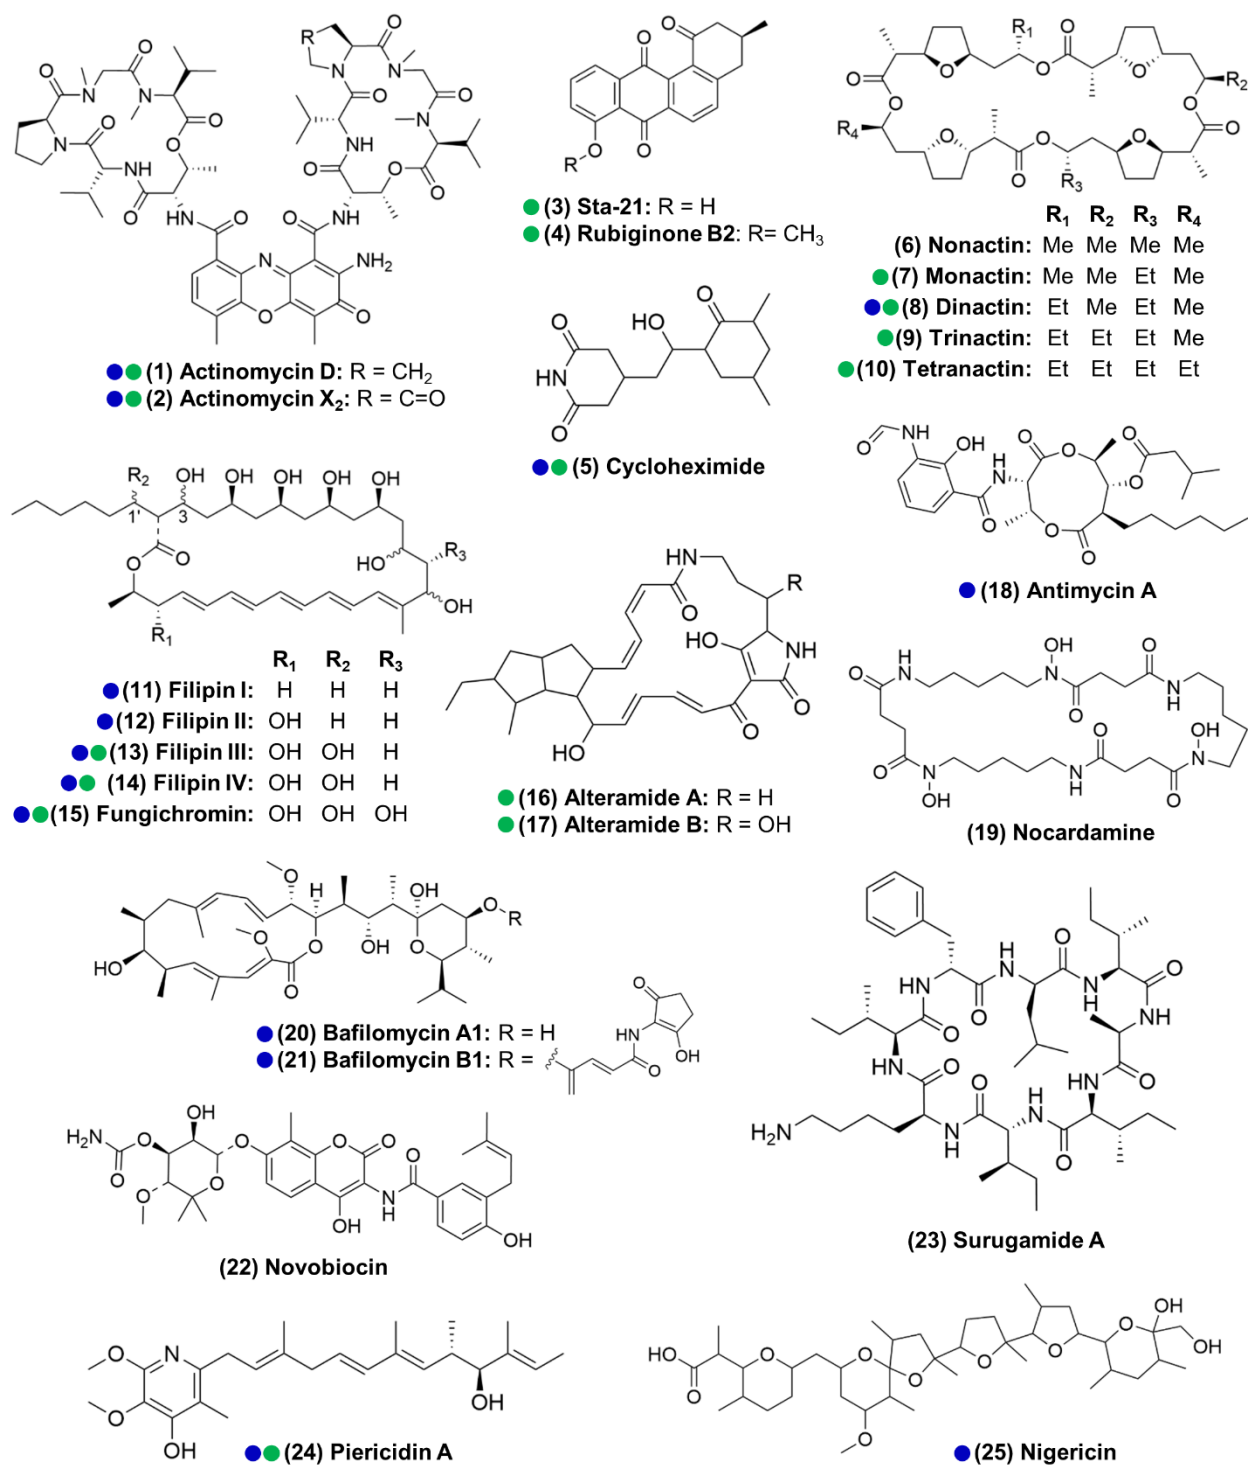

204  
205  
206  
207  
208  
209  
210  
211

**Figure 3:** Actinomycetes associated with the *O. disjunctus* beetle produce structurally diverse specialized metabolites *in vitro* (1-25). Blue circles represent compounds that were previously described to be produced by microbes associated with other insects. Green circles represent compounds detected in the frass that was sampled from wild *O. disjunctus* galleries. Stereochemistry was assigned based on the commercial standard used or from the literature.

212 **Subsets of *O. disjunctus* frass isolates show patterns of stable association and recent/transient**  
213 **acquisition**

214 In the course of characterizing the richness of compounds produced by frass isolates, we observed  
215 that actinomycetes from distant galleries often produced the same compounds *in vitro* (**Supplementary**  
216 **File 1B - Table S2**). Such a pattern could be explained either by intimate, sustained association of these  
217 actinomycetes with the beetle across the range of *O. disjunctus*, or by frequent reacquisition of the  
218 actinomycetes that produce these specific compounds from the environments surrounding *O. disjunctus*  
219 galleries. To investigate this question, we built a phylogenetic tree of the actinomycete isolates from which  
220 we identified at least one compound. Since it is documented that the 16S rRNA gene, commonly used in  
221 bacterial phylogenetic studies, does not provide strong resolution for actinomycetes (Choudoir et al., 2016;  
222 Guo et al., 2008), we built a tree using concatenated sequences of 16S rRNA and those of three  
223 housekeeping genes (*rpoB*, *gyrB*, *atpD*) (see **Supplementary File 1F - Table S6** for the GenBank  
224 accession number of each sequence). Duplicate strains were removed from the tree so as to not  
225 overrepresent clonal strains isolated from the same galleries, resulting in a total of 67 isolates placed on  
226 the tree. We defined duplicates as strains that were isolated from the same gallery that: 1) have identical  
227 sequences for at least one of the four genes, 2) have the same phenotype when growing on ISP2-agar,  
228 and 3) produce the same antimicrobial(s) *in vitro*.

229 Mapping the detected compounds onto a phylogenetic tree showed clear phylogenetic relationships  
230 associated with the production of specific compounds (**Figure 4, Figure 4 – figure supplement 6**). For  
231 example, actinomycins and filipins were consistently co-produced by a specific clade (bootstrap value of  
232 100%) with high genetic relatedness, here identified as *Streptomyces padanus*, which was found in almost  
233 all galleries (19/22, **Appendix 1 - Figure 5**). We also noted that distinct clades with high sequence similarity  
234 produced angucyclinones and bafilomycins, identified as *Streptomyces scopuliridis* and *Streptomyces*  
235 *cellostaticus*, respectively (bootstrap values of 100%). These clades are each composed of highly related  
236 strains despite being isolated from geographically distant galleries (as far as ~1900 km, 10 degrees of  
237 latitude, and 18 degrees of longitude apart. See **Figure 4 – figure supplements 3-5**). Thus, we propose  
238 that these clades are likely stably associated with *O. disjunctus* throughout its range. Other isolates fell into  
239 areas of the tree that held higher phylogenetic diversity, and these strains produced a wider array of

240 compounds, including cycloheximide, PTMs (e.g. alteramides), nigericin, piericidin, nactins, and  
241 novobiocin. The higher phylogenetic diversity of these isolates suggests that they represent transient  
242 members of the frass microbiota that have been more recently acquired from the environment, as opposed  
243 to being stably associated with *O. disjunctus*.

244 The relationship between the strain phylogeny and strain chemistry extended beyond the annotated  
245 compounds. A hierarchical clustering analysis was performed based on the chemical dissimilarity among  
246 culture extracts of the 67 strains, in which more than 19,000 chemical features were included. A tanglegram  
247 built between the phylogenetic tree and chemical dissimilarity dendrogram showed that many strains cluster  
248 together in both analyses (**Figure 4 – figure supplement 2**). This result highlights the strong relationship  
249 between the phylogeny and metabolomes of these strains/clades.

250 Notably, representatives of all three stable clades were isolated from the fresh frass, which serves as  
251 a proxy for the gut content, of adults and larvae. *S. scopuliridis* was also isolated from pupal chamber  
252 material, which is composed of frass (**Figure 4, Figure 4 – figure supplement 6**). Thus, these species are  
253 associated with *O. disjunctus* across its life cycle. These findings support the notion that coprophagy could  
254 be a mode of transmission of these microbes, since the larvae are thought to exclusively consume frass  
255 fed to them by adult beetles (Valenzuela-González, 1992). Additionally, an analysis of metagenomic data  
256 previously generated by members of our team confirmed that *Streptomyces* DNA is present along the adult  
257 *O. disjunctus* digestive tract and is enriched in the posterior hindgut (**Appendix 1 - Figure 6**), the region in  
258 which remaining woody biomass is packed for its release in the form of frass. This finding further  
259 demonstrates that *Streptomyces* are normal members of the *O. disjunctus* gut microbiota.

260 To further investigate the diversity of the *O. disjunctus* streptomycete isolates, a phylogenetic analysis  
261 was performed using 16S rRNA gene sequences of 101 *Streptomyces* isolated from soil from diverse  
262 environments and locations worldwide, combined with the 16S sequences of the 67 *O. disjunctus* isolates  
263 investigated here (Schlatter & Kinkel, 2014). This tree shows that the *O. disjunctus* isolates encompass  
264 substantial diversity across the genus *Streptomyces*, but tended to group together in smaller clades with  
265 bootstrap values typically greater than 90 (**Figure 4 – figure supplement 7**). To further extend this analysis,  
266 we built another phylogenetic tree, this time including 16S rRNA gene sequences from more than 200  
267 *Streptomyces* strains available in GenBank, which were isolated from the gut and galleries of other tropical

268 passalid beetles from Costa Rica (Vargas-Asensio et al., 2014), the gut and exoskeleton of termites from  
269 South Africa (Benndorf et al., 2018) and different species of bees, ants and wasps from Costa Rica  
270 (Matarrita-Carranza et al., 2017). This tree showed that many *O. disjunctus* isolates were grouped in clades  
271 with a high representation of strains isolated from a wide range of insects from distant locations (**Figure 4**  
272 **– figure supplement 8**).

273 Overall, these results are consistent with the idea that a subset of streptomycete clades that produce  
274 specific antimicrobials are stable inhabitants of *O. disjunctus* galleries and are likely transmitted across  
275 generations via coprophagy, while other clades are likely continually introduced from the surrounding  
276 woodland microbial communities. However, we note that deeper sampling could support a stable  
277 association for the more diverse clades as well. Additionally, the 16S rRNA gene sequences of many of the  
278 *Streptomyces* we isolated from *O. disjunctus* largely grouped with other insect-associated *Streptomyces*  
279 strains from around the world, indicating that they may be representatives of lineages that readily form  
280 stable relationships with insects.

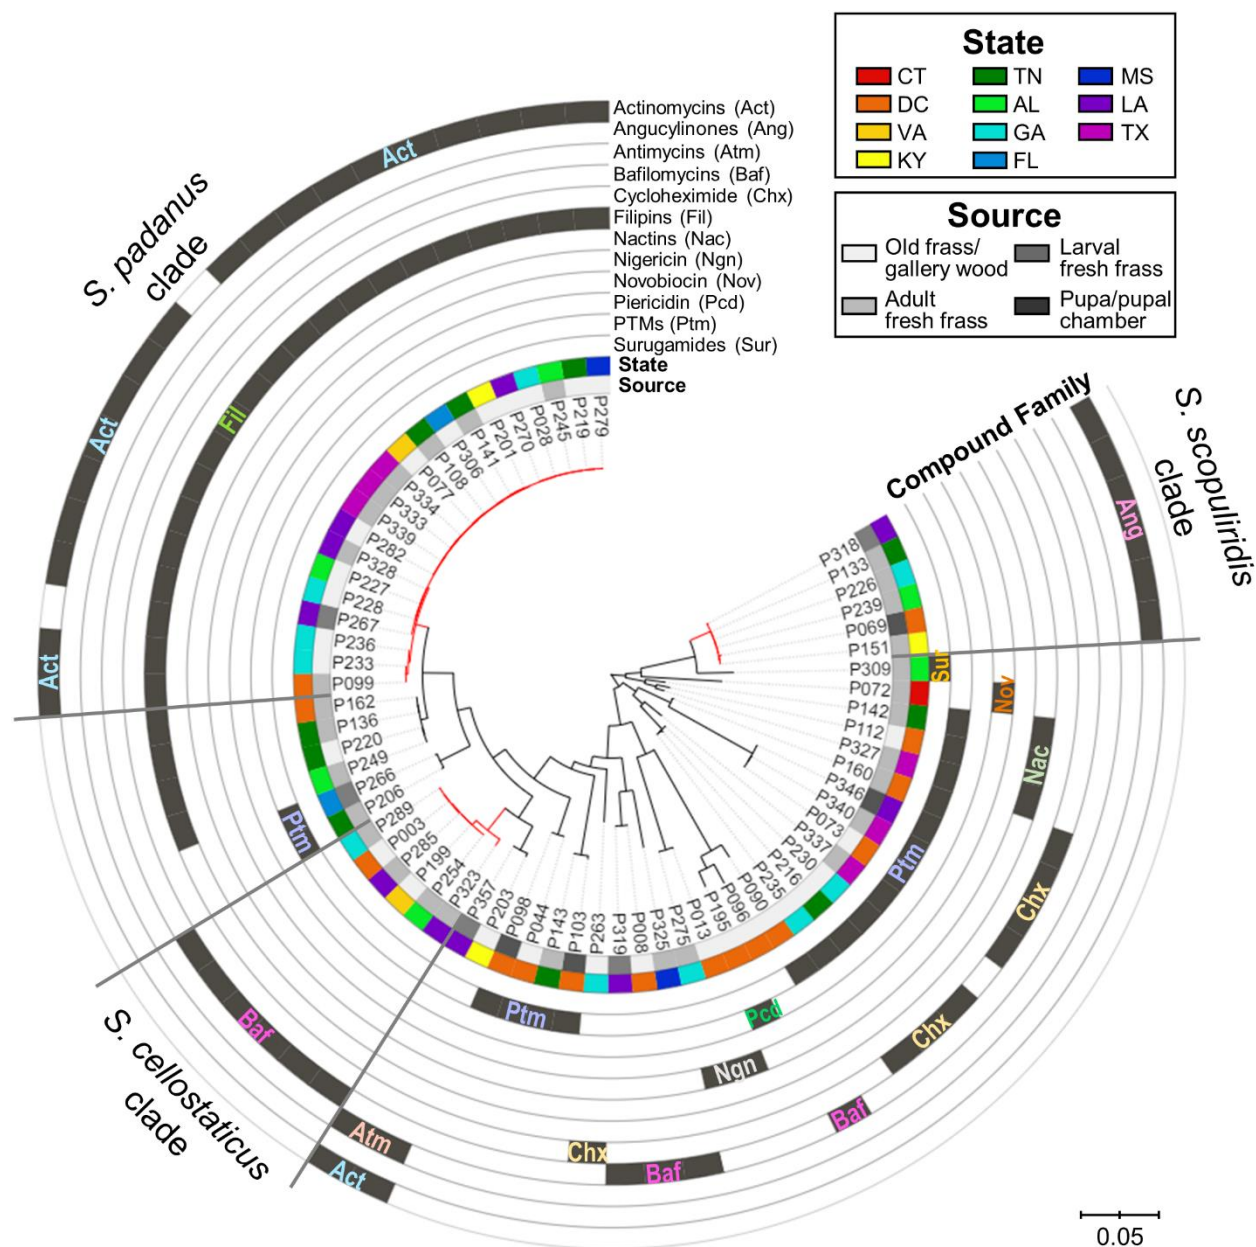

281  
 282 **Figure 4:** Maximum-likelihood phylogenetic tree built using concatenated sequences of four genes (16S  
 283 rRNA, rpoB, gyrB, atpD), annotated with compounds produced by each microbial strain and their  
 284 geographic and source origin (both represented by rings around the tree). Scale bar represents branch  
 285 length in number of substitutions per site. The outgroup (*Mycobacterium tuberculosis* H37RV) was removed  
 286 manually from the tree to facilitate visualization. See **Figure 4 - figure supplement 1** for bootstrap values;  
 287 **supplement 2** for a tanglegram comparing this tree with a chemical dissimilarity dendrogram;  
 288 **supplements 3, 4 and 5** for heatmaps showing the distance between strains geographic location;  
 289 **supplements 6, 7 and 8** for a phylogenetic tree containing, respectively: duplicate strains that were  
 290 removed in this main phylogenetic tree, *O. disjunctus* isolates plus *Streptomyces* isolated from soil samples,  
 291 and *O. disjunctus* isolates plus *Streptomyces* isolated from tropical passalid beetles, termites,  
 292 bees/wasps/ants and soils. Branches in red highlight the three major clades: *S. padanus*, *S. cellostaticus*  
 293 and *S. scopuliridis*. Leaf labels represent the strain code. Act: actinomycins. Ang: angucylinones. Atm:  
 294 antimycins. Baf: bafilomycins. Chx: cycloheximide. Fil: filipins. Nac: nactins. Ngn: nigericin. Nov: novobiocin.  
 295 Pcd: Piericidin. Ptm: polycyclic tetramate macrolactams. Sur: Surugamides.  
 296

297 **Specialized metabolites detected *in situ* show synergistic and antagonistic effects against a wild**  
298 ***Metarhizium anisopliae***

299 The fact that multiple microbial isolates from geographically remote galleries were found to produce the  
300 same compounds, together with the *in situ* detection of these compounds, indicate that antimicrobials made  
301 by actinomycetes often coexist in the frass environment. Therefore, we sought to explore chemical  
302 interactions (i.e. synergism and antagonism) between a subset of the most commonly identified molecules  
303 across our *in situ* and *in vitro* investigations. This list included the ionophore families of the nactins and  
304 filipins, the angucyclinone STA-21 (a Stat3 inhibitor (Song et al., 2005)) and actinomycin X2 (a transcription  
305 inhibitor (El-Naggar et al., 1999)). During our fieldwork, we collected an *O. disjunctus* carcass that was  
306 partially covered with fungal biomass (**Figure 6A**). We identified this material as a strain of *Metarhizium*  
307 *anisopliae* (strain P287), an entomopathogenic fungus with a broad host range (Zimmermann, 1993).

308 We utilized *M. anisopliae* P287 as a target to investigate chemical interactions between the selected  
309 compounds. Using the Bliss Independence model (Bliss, 1939), we found multiple instances of compound  
310 interactions, including synergistic, antagonistic, and additive effects (**Figure 5, Figure 5 - figure**  
311 **supplement 1**). Actinomycin X2 displayed robust synergism with both the filipins and the angucyclinone  
312 STA-21 (**Figure 5A-B**). The actinomycin X2/filipin result is notable since these compounds are usually  
313 made in concert by the same organism (*S. padanus*). In contrast, actinomycin X2 displayed an antagonistic  
314 effect when tested in combination with nactins (**Figure 5C**). The combination of filipins and STA-21 (**Figure**  
315 **5D**) also showed a strongly antagonistic effect. Beyond this, the nactins displayed additive, synergistic, or  
316 antagonistic effects when combined with filipins or the angucyclinone STA-21, and these effects were  
317 concentration-dependent (**Figure 5 - figure supplement 1**). Taken together, these results indicate that the  
318 rich chemical environment of frass is one in which synergism and antagonism among antimicrobials is likely  
319 commonplace.

320



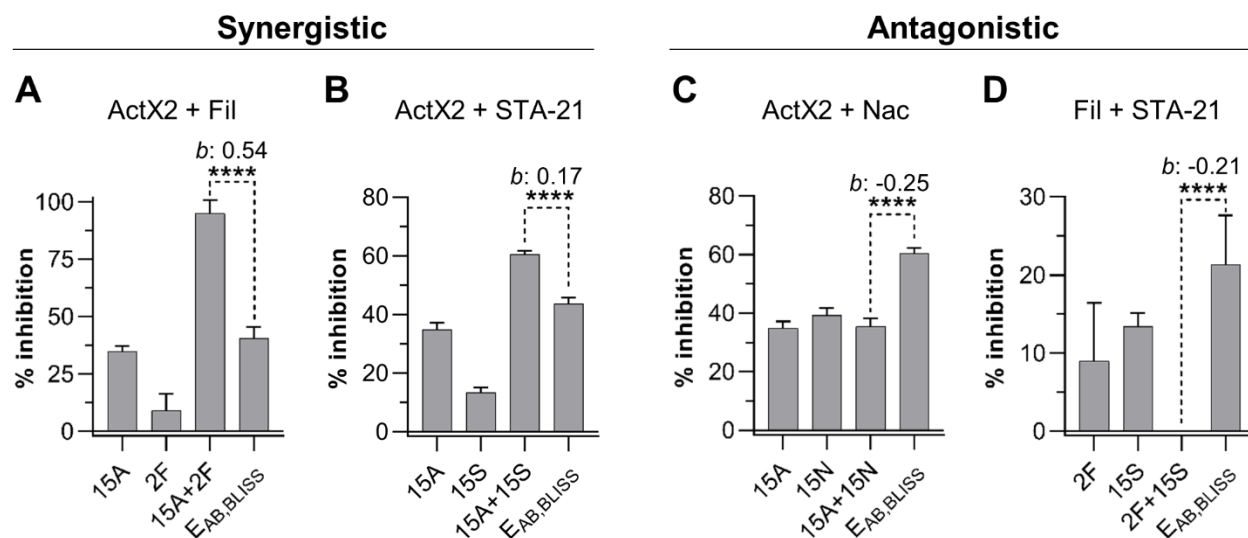

321  
322  
323 **Figure 5:** Actinomycin X2 (ActX2), filipins (Fil), nactins (Nac) and STA-21 display both synergistic and  
324 antagonistic interactions when tested for their ability to inhibit *M. anisopliae* P287 growth. Bars represent  
325 means (+SD) of percent of growth inhibition (sample size: seven independent biological replicates).  
326 Statistical significance was measured using a t-test. \*\*\*\*:  $p < 0.0001$ . Numbers at the X axis represent the  
327 tested concentration of each compound in  $\mu\text{g/mL}$  (F: filipins. A: actinomycin X2. N: nactins. S: STA-21). B:  
328 Bliss excess. E<sub>AB,BLISS</sub>: expected value for an independent (additive) interaction between two drugs  
329 according to the Bliss Independence model. See **Figure 5 – figure supplement 1** for other compound  
330 combinations.

331  
332  
333 **Actinomycetes growing directly in frass inhibit the growth of two strains of *M. anisopliae*, and *S.***  
334 ***padanus* is a superior competitor**

335 We next sought to develop an experimental system based on the *O. disjunctus* frass/streptomycete  
336 association that would enable the quantitative study of microbial interactions under environmentally relevant  
337 conditions. To do so, we selected three *Streptomyces* species that produced compounds that are abundant  
338 in *O. disjunctus* frass. These included *S. padanus* (P333, a producer of actinomycins and filipins), *S.*  
339 *scopuliridis* (P239, a producer of angucyclinones), and *S. californicus* (P327, a producer of nactins and the  
340 PTM alteramides). We also included two strains of *M. anisopliae* (**Appendix 1 - Figure 7**): P287, used in  
341 the synergism/antagonism assays in the prior section, and P016, isolated from frass collected from a *O.*  
342 *disjunctus* gallery near Washington D.C..

343 We first tested the ability of the three streptomycetes to inhibit the two *M. anisopliae* strains in a plate-  
344 based assay. This assay showed that *S. padanus* P333 and *S. scopuliridis* P239 were able to produce  
345 robust zones of inhibition against both *M. anisopliae* strains, while *S. californicus* P327 did not (**Figure 6B**).

346 We next asked whether or not these *Streptomyces* isolates could inhibit the growth of the *M. anisopliae*  
347 strains while growing in frass. To do so, we inoculated known quantities of spores of each microbe into  
348 microtubes containing 3 mg of sterilized dry frass. The water used as the inoculation vehicle supplied  
349 moisture, and the tubes were incubated at 30°C, which is close to the average temperature observed in *O.*  
350 *disjunctus* galleries (see **Supplementary File 1A - Table S1**), for seven days. The microbes were  
351 inoculated in different combinations including: 1) a single microbe per tube, 2) one *Streptomyces* strain +  
352 one *M. anisopliae* strain, and 3) combinations of two *Streptomyces* strains. Also, each microbe was  
353 inoculated into empty microtubes as a control to assess growth promoted by frass.

354 All microorganisms were able to use frass as a substrate for growth, including both *Metarhizium*  
355 *anisopliae* strains whose growth was enhanced ~14-20 fold compared to the no frass control (**Figure 6C,**  
356 **Figure 6 – figure supplement 1**). We note that even though environmental frass often contains multiple  
357 antimicrobials (e.g. **Figure 2**), the heterogeneous nature of this material, plus autoclaving during  
358 preparation, likely means that any native antimicrobials were at low concentration and/or inactivated in  
359 these microbial growth assays. All three *Streptomyces* strains strongly inhibited *M. anisopliae* P016 and  
360 P287 growth in frass ( $p < 0.001$ , **Figure 6D**). We next asked whether or not each *Streptomyces* strain  
361 produced its known antimicrobials while growing in these frass assays. Metabolomics analysis of crude  
362 extracts of the frass material revealed the presence of the actinomycins and filipins produced by *S.*  
363 *padanus*, nactins and alteramides produced by *S. californicus*, and angucyclinones produced by *S.*  
364 *scopuliridis*, matching the compounds produced *in vitro* by these three *Streptomyces* (**Figure 6F, Figure 6**  
365 **- figure supplements 2,3**). These results again highlight frass as an active site for production of  
366 antimicrobials, consistent with the notion that these molecules likely inhibit *M. anisopliae* growth. However,  
367 we note that other molecules not identified here could also play a role in this inhibition, as could competition  
368 for space and/or nutrients.

369 Next, we investigated if the *Streptomyces* strains were capable of inhibiting each other during growth  
370 on frass. When we co-inoculated pairs of streptomycetes on frass, the growth of *S. padanus* P333 was not  
371 affected by either *S. californicus* P327 or *S. scopuliridis* (**Figure 6E**). However, *S. padanus* P333 strongly  
372 inhibited the growth of *S. californicus* P327. It was not possible to assay *S. scopuliridis* P239 growth via  
373 plate counts in the presence of the other *Streptomyces* due to its vulnerability to the antimicrobials they

374 produced *in vitro*. However, we noted that production of the angucyclinone STA-21, which is produced by  
375 *S. scopuliridis* P239, was dramatically reduced when *S. scopuliridis* P239 and *S. padanus* P333 were co-  
376 inoculated in frass, suggesting that *S. padanus* likely had a negative impact on *S. scopuliridis* P239 in this  
377 treatment (**Figure 6 – figure supplement 3**). Collectively, these findings offer direct evidence that in frass,  
378 *Metarhizium anisopliae* strains isolated from *O. disjunctus*-associated environments can be strongly  
379 inhibited by *Streptomyces* isolates that produce antimicrobials. Moreover, among the *Streptomyces* strains,  
380 *S. padanus* P333 appeared to be the superior competitor during co-cultivation on frass.

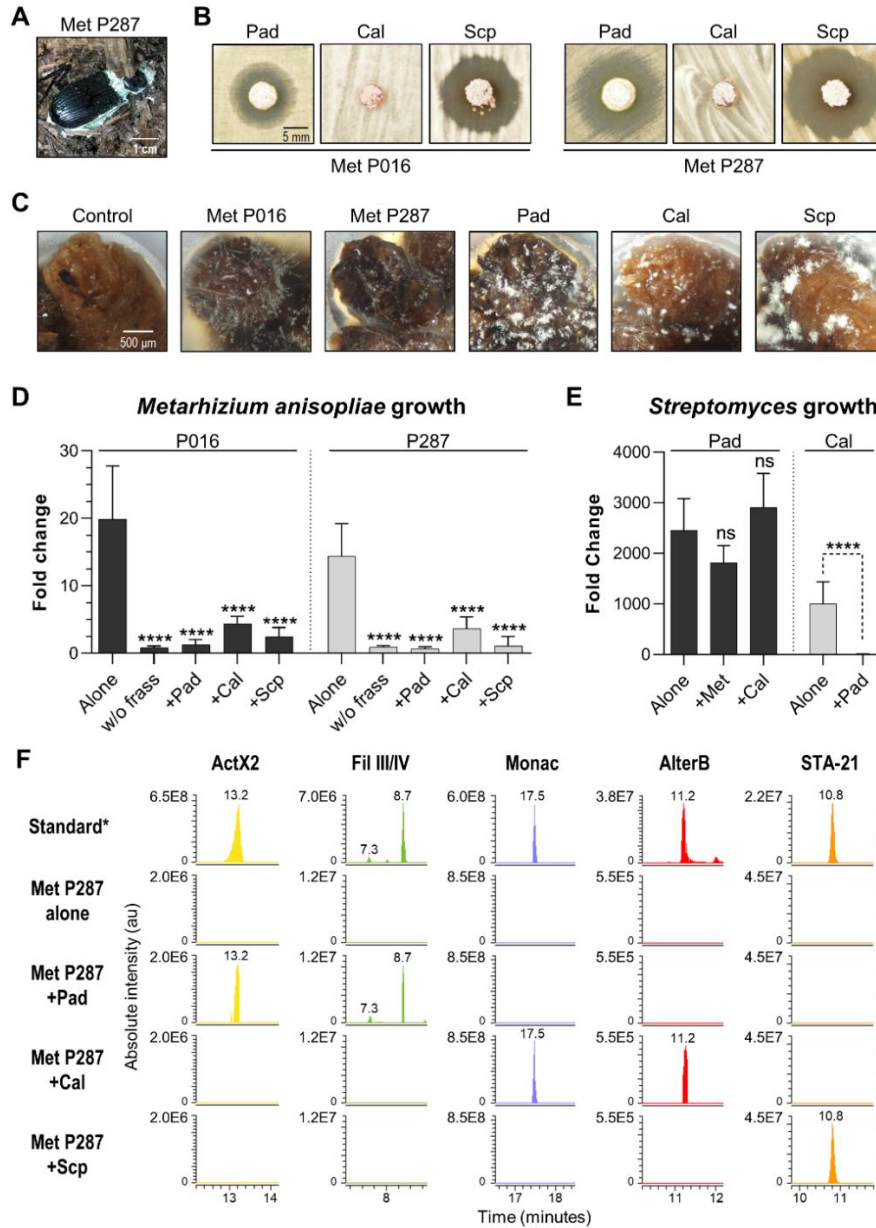

381  
382 **Figure 6:** Competitive interactions between key *Streptomyces* isolates and entomopathogenic fungal strains directly in frass. **A)** Beetle carcass with *M. anisopliae* P287. **B)** Selected streptomycetes displayed a ZOI against wild isolates of *M. anisopliae*. **C)** Each selected microbe growing on frass material after seven days of incubation (7x magnification). **D)** *M. anisopliae* growth represented in fold change when growing alone versus in the presence of a streptomycete. **E)** *S. padanus* P333 and *S. californicus* P327 growth represented in fold change when growing alone versus in the presence of another organism. **F)** Extracted ion chromatograms (EIC) of specialized metabolites detected in treatments containing *M. anisopliae* P287. \*Standard: a mixture of crude ethyl acetate extracts of ISP2-solid cultures of the three streptomycetes. Pad: *S. padanus* P333. Cal: *S. californicus* P327. Scp: *S. scopuliridis* P239. Met: *M. anisopliae*. w/o frass: microbe added to an empty microtube. Alone: single microbe. ActX: actinomycin X2. FilIII/IV: filipins III and IV. Monac: monactin. AlterB: alteramide B. Bars represent means (+SD) of growth in fold change from time zero to day seven of incubation (sample size: eight independent biological replicates). Statistical significance was measured by comparing treatments to microbes grown alone on frass, using t-test when comparing two groups or ANOVA followed by Tukey's test when comparing more than two groups. ns: statistically not significant. \*\*\*\* p<0.0001. See **Figure 6 – figure supplements 1-3** for additional results.  
389  
390  
391  
392  
393  
394  
395  
396

397 **DISCUSSION**

398 Symbioses in which insects partner with actinomycetes for chemical defense against pathogens are  
399 attractive models for investigating the ecology of specialized metabolites (Behie et al., 2017; Chevrette et  
400 al., 2019; Chevrette & Currie, 2019; Matarrita-Carranza et al., 2017; Van Arnam et al., 2018). The best-  
401 characterized examples of such symbioses include the eusocial, neotropical leafcutter ants and the solitary  
402 beewolf wasps, and their respective actinomycete associates (Engl et al., 2018; Kaltenpoth et al., 2014; Li  
403 et al., 2018; Menegatti et al., 2020). While these systems have provided a remarkable window into the  
404 ecology of specialized metabolism, many questions remain regarding insect/actinomycete symbioses in the  
405 context of differing social structures, mechanisms of microbial transmission, and strategies to combat  
406 pathogens.

407 Here, we investigated the subsocial passalid beetle *O. disjunctus*, and its frass, as a system for  
408 dissecting the chemical ecology of actinomycete specialized metabolism. Through direct chemical analysis,  
409 we found that frass from galleries across the geographic range of *O. disjunctus* contained at least seven  
410 different families of known actinomycete-produced antimicrobials, and that production of at least four of  
411 these families (actinomycins, angucyclinones, nactins, and cycloheximide) is widely distributed across  
412 eastern North America. Additionally, actinomycete isolates from frass produced twelve different families of  
413 antimicrobials, including all of those observed in frass. Using a simple assay with frass as a growth medium,  
414 we also demonstrated that multiple actinomycete isolates from *O. disjunctus* galleries could directly inhibit  
415 the growth of the fungal pathogen *M. anisopliae*. Taken together, these findings place the *O.*  
416 *disjunctus*/frass system among the most chemically rich insect/actinomycete associations characterized  
417 thus far. These results are consistent with a model in which this antimicrobial richness benefits *O. disjunctus*  
418 by limiting fungal pathogen growth in the frass inside its galleries. Beyond these findings, the tractability of  
419 the *O. disjunctus*/actinomycete system makes it an attractive model from multiple experimental  
420 perspectives, enabling research across scales from biogeographical surveillance to *in vitro* mechanistic  
421 investigation.

422

423

424

## 425 **The *O. disjunctus*/actinomycete partnership comprises a rich chemical system**

426 A key obstacle in the study of the ecology of specialized metabolites is the detection of these  
427 compounds *in situ*. Historically, this detection has been challenging for multiple reasons: i) specialized  
428 metabolites exist at relatively low concentrations within complex chemical environments (Grenni et al.,  
429 2018; Kellner & Dettner, 1995; Schoenian et al., 2011); ii) their production probably occurs in a dynamic  
430 spatio-temporal manner (Debois et al., 2014; Pessotti et al., 2019); iii) additional factors like light,  
431 temperature, and pH might alter their chemical structures and stabilities (Boreen et al., 2004; Cycoń et al.,  
432 2019; Edhlund et al., 2006; Gothwal & Shashidhar, 2015; Mitchell et al., 2014; Thiele-Bruhn & Peters,  
433 2007); and iv) some compounds are likely degraded by surrounding microbes (Barra Caracciolo et al.,  
434 2015; Gothwal & Shashidhar, 2015; Grenni et al., 2018). For these reasons, knowledge of when and where  
435 microbes produce specialized metabolites in natural settings is extremely limited.

436 The frass found in *O. disjunctus* galleries constitutes an important commodity in the lifestyle of this  
437 beetle. The frass itself is composed of partially digested wood with high organic carbon content, and  
438 nitrogen fixation by microbes in the gut of *O. disjunctus* enhances its bioavailable nitrogen content as well  
439 (Ceja-Navarro et al., 2014, 2019). Thus, frass represents a valuable nutrient source for these beetles, any  
440 associated microbes, and potential pathogenic invaders. The frass is also a key component in this system,  
441 because: i) all the *O. disjunctus* individuals in a gallery are in constant contact with it, ii) adults feed it to the  
442 larvae, and iii) pupal chambers, which encapsulate fragile *O. disjunctus* pupae, are made of this material  
443 (Pearse et al., 1936; Schuster & Schuster, 1985). Based on parallels between *O. disjunctus* and other social  
444 insects that form actinomycete symbioses, we hypothesized that frass material was likely to contain  
445 actinomycete symbionts and their specialized metabolites.

446 To directly assess if antimicrobial compounds were present in this beetle/frass system, we sampled  
447 frass from 22 natural *O. disjunctus* galleries, and in some cases, we were also able to collect pupal chamber  
448 material (galleries 2-DC, 15-FL and 17-LA). When we analyzed the chemical composition of these frass  
449 samples using high resolution LC-MS/MS, we detected seven families of actinomycete-produced  
450 antimicrobials: actinomycins (**1**, **2**), angucyclinones (**3**, **4**), cycloheximide (**5**), nactins (**7-10**), polyene  
451 macrolides (**13-15**), piericidin A (**24**) and alteramides (PTMs) (**16**, **17**). Actinomycins, angucyclinones,  
452 nactins, and polyene macrolides were also detected in pupal chamber material (17-LA). Of these

453 compounds, only actinomycin X2 and piericidin A have previously been directly detected in material  
454 associated with insects, e.g. waste material of laboratory colonies of *Acromyrmex echinator* (a species of  
455 Attine ant) and associated with beewolf antennal glands and cocoons, respectively (Engl et al., 2018;  
456 Kaltenpoth et al., 2016; Kroiss et al., 2010; Ortega et al., 2019; Schoenian et al., 2011).

457 This work expands the list of antimicrobials detected directly in material associated with insects to  
458 include the PTMs, polyene macrolides, cycloheximide, nactins, and angucyclinones. In addition, we found  
459 that *O. disjunctus* frass also commonly contains beauvericin, which is an insecticidal specialized metabolite  
460 known to be produced by multiple fungal entomopathogens. This observation, and our isolation of  
461 *Metarhizium anisopliae* from frass and an *O. disjunctus* carcass, suggest that *O. disjunctus* galleries are  
462 likely under pressure from fungal entomopathogens. Moreover, subsocial insects, such as *O. disjunctus*,  
463 are at higher risk than solitary insects of pathogenic spread due their frequent social interactions (Onchuru  
464 et al., 2018). Based on these results, we hypothesized that the rich array of antimicrobials produced by  
465 actinomycetes in *O. disjunctus* frass affords these beetles defense against pathogenic overtake of both a  
466 food source, and material used for protection during metamorphosis. It is important to note that  
467 *Streptomyces* spp. are also known producers of enzymes that degrade wood components, e.g. cellulose,  
468 lignin, and xylose (Book et al., 2014, 2016). Therefore, the streptomycete community associated with *O.*  
469 *disjunctus* may play a nutritional role in this system as well. Indeed, Vargas-Asensio *et al.* (2014) provided  
470 strong evidence that *Streptomyces* play an important role as nutritional symbionts in tropical passalid  
471 beetles from Central America (Vargas-Asensio et al., 2014). However, we note that more research is  
472 necessary to further investigate this hypothesis specifically for *O. disjunctus*.

473 To lay the groundwork for hypothesis testing in this system, we developed an assay using sterilized  
474 frass as a growth medium. We used this assay to assess if *Streptomyces* spp. isolated from *O. disjunctus*  
475 galleries grew in this material, produced specialized metabolites, and inhibited the growth of  
476 entomopathogens. All three *Streptomyces* isolates we tested (including strains of *S. padanus*, *S.*  
477 *scopuliridis*, and *S. californicus*) grew, produced antimicrobials, and effectively curtailed pathogen  
478 (*Metarhizium anisopliae*) growth in frass. Additionally, *S. padanus*, which was the actinomycete most  
479 commonly isolated from frass, outcompeted the other two *Streptomyces* strains we tested, providing a  
480 rationale for its prevalence in *O. disjunctus* galleries. Together, our findings support a model in which

481 diverse *Streptomyces* in *O. disjunctus* frass benefit this beetle by inhibiting the growth of fungal pathogens  
482 in their galleries. Beyond this, these results illustrate that this simple, frass-based assay can be used to  
483 study interactions between microbes in this system in a nutrient environment similar (if not virtually identical)  
484 to that found in *O. disjunctus* galleries in nature. This assay sets the stage for further genetic/chemical  
485 experimentation to dissect the role of individual specialized metabolites that may regulate these microbial  
486 interactions.

487

#### 488 **Contrasting chemical strategies across insect/actinomycete symbioses**

489 The beewolf, leafcutter ants, and *O. disjunctus* systems may represent a spectrum of chemical defense  
490 strategies that are maintained by different modes of transmission and reflect distinct selective pressures.  
491 The beewolf system contains the highest level of symbiote specificity, with a single species (or species  
492 complex) of streptomycete symbiont, and a relatively low diversity of chemical scaffolds that vary in their  
493 relative concentrations (Engl et al., 2018; Kaltenpoth et al., 2014). Engl. *et al.* hypothesized that this subtle  
494 variation in component concentrations within the beewolf antimicrobial cocktail has been sufficient to  
495 maintain its efficacy over evolutionary time due to the lack of a specialized antagonist (i.e. a specific  
496 pathogen that is encountered repeatedly over evolutionary time when beewolves construct their brood  
497 chambers) (Engl et al., 2018). In contrast, various species of leafcutter ants appear to have changed  
498 actinomycete partners multiple times throughout the history of their symbioses (Cafaro et al., 2011; Li et  
499 al., 2018; McDonald et al., 2019), which has likely led to increased diversity of associated antimicrobials  
500 found across and within species of leafcutter ants. Such a strategy makes sense given that leafcutter ants  
501 are in a constant arms race with a specific pathogen (*Escovopsis* sp.) that may evolve resistance over time  
502 (Batey et al., 2020).

503 The specialized metabolite richness we observe directly in frass from wild *O. disjunctus* galleries  
504 surpasses that described for beewolves and leafcutter ants. One possible explanation for this richness is  
505 that the unique vulnerabilities associated with the high nutritional content of frass, and the important role it  
506 plays in *O. disjunctus* social interactions, may place a premium on maximizing antimicrobial diversity in this  
507 material. This may be especially advantageous given that multiple types of opportunistic fungal pathogens,



508 including *Metarhizium anisopliae* (based on isolations), and possibly *Beauveria* spp. and/or *Fusarium* spp.  
509 (based on detection of beauvericin), appear to be common residents in *O. disjunctus* galleries.

510 Unlike beewolves and leafcutter ants, *O. disjunctus* does not appear to have specialized structures for  
511 maintaining and transporting microbial symbionts (M. D. Ulyshen, 2018). Instead, we suggest that *O.*  
512 *disjunctus* relies on coprophagy for transmission of associated microbes across generations, which is a  
513 common mechanism for transfer of non-actinomycete symbionts in other insect systems (Onchuru et al.,  
514 2018). Our phylogenetic and chemical analysis of 67 *Streptomyces* isolates from *O. disjunctus* galleries  
515 indicates that at least three clades, including the *S. padanus*, *S. scopuliridis*, and *S. cellostaticus* clades,  
516 contain members that are highly related despite being isolated from across a wide geographic area. This  
517 pattern fits the expectation for symbionts that are likely transmitted to the progeny instead of randomly re-  
518 acquired from the environment. The idea that coprophagy, which is the primary means of larval nutrient  
519 acquisition, may serve as a mechanism for microbial transmission is supported by our findings that multiple  
520 representatives of these clades were isolated directly from fresh frass produced by larvae and adult beetles.  
521 Beyond this, data from our previous metagenomic analysis indicates that *Streptomyces* inhabit the beetle  
522 digestive tract, with a notable enrichment in the posterior hindgut (**Appendix 1 - Figure 6**). Our phylogenetic  
523 analysis also indicates that frass contains diverse actinomycetes that are transient or recently acquired  
524 members of this system.

525 Based on this evidence, the *O. disjunctus* system appears capable of maintaining both stable members  
526 and migrants that are constantly sampled from the surrounding environment. Thus, we suggest that in the  
527 case of *O. disjunctus*, the relatively non-specific nature of coprophagy as a microbial transmission  
528 mechanism may enable multiple *Streptomyces* lineages to competitively inhabit this system, resulting in a  
529 correspondingly wide profile of antimicrobials with varied mechanisms of action. We note that further  
530 experiments will be required to directly verify if coprophagy is the main mode of transmission of associated  
531 actinomycetes in this system. Beyond this, a deeper chemical sampling of other insect/actinomycete  
532 systems will be required to determine if specialized metabolite richness similar to what we observe here for  
533 frass is typical for insects that employ coprophagy as a mode of vertical actinomycete transmission.

534

535

## 536 **Implications of synergy and antagonism in a system rich in antimicrobials**

537 The high richness of antimicrobials found in *O. disjunctus* frass suggests that synergy or antagonism  
538 between these molecules may be commonplace in this environment. Strains of *S. padanus*, which we  
539 isolated from 19/22 of the galleries, typically produce both actinomycins and polyene macrolides (e.g.  
540 filipins), and these two antimicrobial families were also detected in frass from multiple galleries. When we  
541 tested actinomycin and filipin in combination against an *O. disjunctus*-associated strain of *M. anisopliae*,  
542 we found that they were strongly synergistic. Likewise, actinomycin X2 was also robustly synergistic with  
543 the most commonly detected antimicrobial in frass, STA-21 (an angucyclinone). Thus, synergism may  
544 potentiate the antimicrobial activity of multiple molecules produced by single strains, as well as molecules  
545 produced across species. These findings are aligned with previous work that has suggested that some  
546 insects, such as bees, might make use of cocktails of synergistic antimicrobials akin to ‘combination  
547 therapy’ (Engl et al., 2018; Schoenian et al., 2011). In contrast, we also found multiple instances of  
548 molecular antagonism, including between filipins and STA-21, and between actinomycin and nactins, which  
549 were the second most frequently detected antimicrobial in frass samples. While antagonism between  
550 molecules in frass may lead to diminished potency in the short term, emerging evidence indicates that  
551 antagonism can guard against the evolution of antimicrobial resistance (Chait et al., 2007). Collectively, our  
552 *in vitro* results, and the distributions of antimicrobials we detected *in situ*, lead us to speculate that the  
553 actinomycete community in frass likely produces an ever-shifting landscape of antimicrobial combinations,  
554 where their activities are constantly enhanced or dampened, but also buffered against the development of  
555 pathogen resistance. We hypothesize that such an environment may present a more challenging target for  
556 would-be pathogens, compared to one in which a single antimicrobial, or antimicrobial combination, is  
557 dominant.

558

## 559 ***O. disjunctus*/actinomycete partnership as a model for investigating the biogeography of** 560 **specialized metabolism**

561 The detection of specialized metabolites directly in frass, combined with the expansive range of *O.*  
562 *disjunctus*, enabled us to study the biogeography of specialized metabolism within this system on a  
563 continental scale. Remarkably, four of the seven actinomycete compound families we detected *in situ*,

564 including actinomycins, angucyclinones, nactins, and cycloheximide were found throughout the range of *O.*  
565 *disjunctus*, with each compound being represented in colonies separated by >1,900 km. Given the  
566 challenges associated with detecting specialized metabolites *in situ*, and our stringent thresholds for calling  
567 positive compound hits, we hypothesize that some compounds found at low frequency in our analyses are  
568 also likely to be widely distributed in *O. disjunctus* galleries. Taken together, these results indicate that the  
569 broad cocktail of antimicrobials collectively found in *O. disjunctus* galleries is consistently drawn from the  
570 same large molecular cohort over thousands of square kilometers, rather than being regionally limited. This  
571 wide geographical distribution of compounds is further supported by our *in vitro* analyses, with producers  
572 of actinomycins, polyene macrolides, bafilomycins, cycloheximide, and PTMs commonly isolated from  
573 colonies across the entire sampling area.

574 Notably, *Streptomyces* species that are candidates for stable members within this system (i.e. the *S.*  
575 *padanus*, *S. scopuliridis*, and *S. cellostaticus* clades) were found in galleries distributed across ten degrees  
576 of latitude. Similarly, *S. philanthi* is tightly associated with beewolf wasps across an even greater latitudinal  
577 range (Kaltenpoth et al., 2006, 2014). The wide latitudinal distribution of the *Streptomyces* species  
578 associated with these two insect hosts stands in contrast with patterns observed for soil-associated  
579 streptomycetes. Specifically, previous studies demonstrated that soil-dwelling streptomycetes, and  
580 specialized metabolite biosynthetic gene clusters in soil, were limited to much narrower latitudinal  
581 distributions (Charlop-Powers et al., 2015; Choudoir et al., 2016; Lemetre et al., 2017). Thus, results  
582 presented here, combined with the studies of beewolf wasps/*S. philanthi*, suggest that by partnering with  
583 insects, actinomycetes and their specialized metabolite arsenals can escape normally strong latitudinal  
584 constraints.

585

## 586 **Concluding remarks**

587 The *O. disjunctus*/actinomycete system provides a new platform for investigation of the chemical  
588 ecology of specialized metabolites. Notably, this system enables investigation of patterns in microbial  
589 specialized metabolism associated with a single insect species *in natura* across scales ranging from  
590 thousands of kilometers to binary microbial interactions at micro scales in the laboratory. In contrast to  
591 archetypal insect/actinomycete symbioses that rely on highly specific symbiotes which produce a limited

592 number of antimicrobial compounds, our results suggest that the *O. disjunctus* lifestyle enables both  
593 microbial and chemical richness in their galleries. Continued exploration of novel insect/actinomycete  
594 systems will be critical to gaining a complete understanding of the strategies and mechanisms that underpin  
595 evolutionarily durable chemical defenses against pathogenic microbes in natural settings.

596

## 597 **MATERIALS AND METHODS**

### 598 **Chemical standards**

599 Actinomycin D (Sigma-Aldrich, A1410), Actinomycin X2 (Adipogen, BVT-0375), Antimycin A (Sigma-  
600 Aldrich, A8674), Bafilomycin A1 (Cayman Chemical, 11038), Bafilomycin B1 (Cayman Chemical, 14005),  
601 Cycloheximide (ACROS Organics, AC357420010), Filipin complex (Sigma-Aldrich, F9765), Nigericin  
602 sodium salt (Cayman Chemical, 11437), Nactins mixture (Cayman Chemical, 19468), Novobiocin sodium  
603 salt (Calbiochem, 491207), Piericidin A (Cayman Chemical, 15379), Rubiginone B2 (Santa Cruz  
604 Biotechnology, sc-212793), and STA-21 (Sigma-Aldrich, SML2161).

605

### 606 **Culture media**

607 International Streptomyces Project 2 (ISP2)-broth: malt extract 10 g/L, yeast extract 4 g/L, dextrose 4 g/L,  
608 pH 7.2; ISP2-agar: ISP2-broth plus agar 18 g/L; adapted AGS: L-arginine 1 g/L, glycerol 12.5 g/L, NaCl  
609 1g/L, K<sub>2</sub>HPO<sub>4</sub> 1 g/L, MgSO<sub>4</sub>·7H<sub>2</sub>O 0.5 g/L, FeSO<sub>4</sub>·7H<sub>2</sub>O 10 mg/L, MnCl<sub>2</sub>·4H<sub>2</sub>O 1 mg/L, ZnSO<sub>4</sub>·7H<sub>2</sub>O 1 mg/L,  
610 and agar 18 g/L, pH 8.5; Potato Dextrose Broth (PDB): potato starch 4 g/L and dextrose 20 g/L; Potato  
611 Dextrose Agar (PDA): PDB plus agar 18 g/L; 0.1x PDB+MOPS: potato starch 0.4 g/L, dextrose 2 g/L, 0.165  
612 M MOPS, pH 7.0; SM3: dextrose 10 g/L, peptone 5 g/L, tryptone 3 g/L, sodium chloride 5 g/L, and agar 18  
613 g/L, pH 7.2. V8-juice-agar: V8-juice 20% (v/v), agar 18 g/L. All media were autoclaved for 30 min at 121°C  
614 and 15 psi.

615

### 616 **Environmental sample collection**

617 Fallen decaying logs were pried open to initially examine if *O. disjunctus* beetles were present. Ethanol-  
618 cleaned spatulas were used to obtain three samples of frass ("old frass") and wood from different parts of  
619 the galleries. Whenever found, pupal chambers were scraped out of the galleries with a clean spatula, the  
620 pupa was placed back inside the gallery, the pupal chamber material was placed in a clean plastic bag, and  
621 the pupa was gently swabbed with a sterile cotton swab. Beetles (3-6) were temporarily collected and  
622 placed inside a sterile Petri dish for 15-30 min to allow them to produce frass ("adult fresh frass"), and this  
623 material was transferred to a sterile microtube utilizing a clean set of tweezers; the same was performed  
624 with larvae when they were found in the galleries ("larval fresh frass"). Upon completion of sampling, logs

625 were placed back into their original position to minimize environmental impact. Samples were shipped the  
626 same day to our laboratory, according to the United States Department of Agriculture (USDA) guidelines  
627 and stored at 4°C for up to one month before being processed. A small part of each sample (3-5 mg) was  
628 stocked in 25% glycerol at -80°C for microbial isolation, and the rest was set aside for chemical extraction.  
629 In total, 22 galleries were sampled across 11 US states. Check **Supplementary File 1A - Table S1** for  
630 geographic location and abiotic information of each gallery. The following permits were acquired prior to  
631 sample collection and transportation: USDA Permit to Move Live Plant Pests, Noxious Weeds, and Soil:  
632 P526P-18-03736; Rock Creek National Park permit number: ROCR-2018-SCI-0021; Jean Lafitte National  
633 Park permit number: JELA-2019-SCI-0001. For all other locations, the access was granted on the same  
634 day of collection by either the owner or manager of the property. The state boundaries in the map containing  
635 the geographic location of each sampled gallery were plotted using the 2019 TIGER/Line Shapefiles  
636 provided by the U.S. Census Bureau 2019 (accessed on March/2020,  
637 [https://catalog.data.gov/dataset/tiger-line-shapefile-2019-nation-u-s-current-state-and-equivalent-](https://catalog.data.gov/dataset/tiger-line-shapefile-2019-nation-u-s-current-state-and-equivalent-national)  
638 national).

639

#### 640 **Isolation of microorganisms**

641 An aliquot of frass, wood and pupal chamber samples stored in 25% glycerol was spread with glass beads  
642 onto two selective media: SM3 and AGS supplemented with cycloheximide (10 µg/mL) and nalidixic acid  
643 (50 µg/mL) to enrich for actinomycetes. Swabs containing pupal samples were swabbed onto the same  
644 media. The beetle carcass found in the environment (**Figure 6A**) was dissected, and the fuzzy material  
645 collected was spread onto PDA plates for isolation of fungi. Plates were incubated at 30°C, and periodically  
646 checked for microbial growth for up to a month. Microbial colonies were picked, streak-purified and stocked  
647 in 25% glycerol at -80°C. Check **Supplementary File 1B – Table S2** for detailed information about each  
648 isolated strain.

649

#### 650 **Antagonism assays**

651 All microbial isolates were grown on ISP2-agar medium for one week at 30°C for antimicrobial assays and  
652 chemical extraction. After seven days of incubation, a plug-assay was performed: 5 mm plugs were

653 transferred from the culture plates to the ISP2-agar plates containing a fresh lawn of *B. subtilis* or *C.*  
654 *albicans* (one day before the assay, the indicator strains *Bacillus subtilis* 3610 and *Candida albicans* GDM  
655 2346 WT were grown in 5 mL of ISP2-broth for 16-18 h at 30°C, 200 rpm. Both indicator strains were then  
656 diluted 1:50 in fresh ISP2-broth and spread onto a new ISP2 plate with a swab to create a lawn). Plates  
657 were incubated at 30°C for 24h. Activity was visually inspected by measuring the zone of inhibition (ZOI).  
658 In some specific cases, *Metarhizium anisopliae* strains P016 and P287 were used as the indicator strain.  
659 A lawn of these fungi was created by spreading spores with a swab onto ISP2-agar plates, and in this case  
660 the incubation time was three days before measuring the ZOI. Spores were collected from seven days-old  
661 *M. anisopliae* P016 and P287 growing on V8-juice-agar plates at 25°C under constant light.

662

### 663 **Chemical extractions**

664 Cultures on ISP2-agar: Ten 5 mm plugs were collected from culture plates and placed in a 2 mL microtube  
665 with 750 µL of ethyl acetate, sonicated for 10 min, and left at room temperature (RT) for 1h. The solvent  
666 was then transferred to a new microtube and dried under vacuum at 45°C. An extraction control of sterile  
667 ISP2-agar plates was performed following the same steps.

668 Environmental samples: Frass and pupal chamber material samples were extracted three times in ethyl  
669 acetate: 10 mL of ethyl acetate was added to 4-5 g of material placed in a 50 mL conical tube, sonicated  
670 for 10 min, placed on a rocking shaker at 60 rpm for 30 min, and decanted. The obtained extract was  
671 centrifuged at 5000 rpm for 5 min to pellet the remaining frass material, and the solvent was dried under  
672 vacuum at 45°C. An extraction control without any sample added to the tube was performed following the  
673 same steps.

674

### 675 **LC-MS and LC-MS/MS analysis**

676 Crude extracts were resuspended at 1 mg/mL in 500 µL of methanol containing an internal standard  
677 (reserpine at 1 µg/mL), sonicated for 5 min and centrifuged for another 5 min at 13,000 rpm to pellet  
678 particles. A 50 µL aliquot was taken from each sample and pooled to generate the pooled-QC for quality  
679 control. Extracts were analyzed in a randomized order using an ultra-high pressure liquid chromatography  
680 system (LC, Thermo Dionex UltiMate 3000, ThermoFisher, USA) coupled to a high resolution tandem mass

681 spectrometer (MS/MS, Thermo Q-Exactive Quadrupole-Orbitrap, ThermoFisher, USA) equipped with a  
682 heated electrospray ionization source (LC-MS/MS), using a C18 column (50 mm x 2.1 mm, 2.2  $\mu$ m, Thermo  
683 Scientific Acclaim™ RSLC). A gradient of 0.1% formic acid in water (A) and 0.1% formic acid in acetonitrile  
684 (B) was used at a flow of 0.4 mL/min, specifically: 0-1 min 30%B, 1-13 min 30-100%B, 13-16.5 min 100%  
685 B, 16.5-17 min 100-30%, 17-20 min 30%B. The injection volume was 5  $\mu$ L, and the column oven was set  
686 at 35°C. Analyses were performed in profile mode both with and without MS/MS acquisition (LC-MS/MS  
687 and LC-MS, respectively). The full MS1 scan was performed in positive mode, resolution of 35,000 full width  
688 at half-maximum (FWHM), automatic gain control (AGC) target of  $1 \times 10^6$  ions and a maximum ion injection  
689 time (IT) of 100 ms, at a mass range of  $m/z$  200-2000. For LC-MS/MS analysis, the MS/MS data was  
690 acquired using the data-dependent analysis mode (DDA), in which the 5 most intense ions were sent for  
691 fragmentation (Top5 method), excluding repetitive ions for 5 seconds (dynamic exclusion), at a resolution  
692 of 17,500 FWHM, AGC target of  $1 \times 10^5$  ions and maximum IT of 50 ms, using an isolation window of 3  $m/z$   
693 and normalized collision energy (NCE) of 20, 30 and 40. LC-MS runs of environmental samples were  
694 performed in three technical replicates aiming to increase the confidence in the observed chemical features.  
695 In some cases, a targeted LC-MS/MS method was optimized to confirm the presence of the annotated  
696 compound. The raw data was deposited on the Mass Spectrometry Interactive Virtual Environment  
697 (MassIVE, <https://massive.ucsd.edu/>, identifiers: MSV000086314, MSV000086312, MSV000086311,  
698 MSV000086330, MSV000086423).

699

## 700 **Compound identification**

701 The LC-MS/MS data collected was processed using the open-access software MS-Dial version 4.0  
702 (Tsugawa et al., 2015), using optimized parameters. Chemical dereplication was performed by comparing  
703 the  $m/z$  of detected features to the databases Antibase 2012 (Laatsch, 2012) and the Dictionary of Natural  
704 Products (<http://dnp.chemnetbase.com/>, Accessed on Feb/2019), allowing a maximum mass accuracy  
705 error of  $\pm 5$  ppm, and checking for the presence of at least two adducts with similar retention time ( $\pm 0.1$  min).  
706 Molecular networking using the GNPS platform (M. Wang et al., 2016) was also performed for de-  
707 replication. The extracted ion chromatogram (EIC) of each chemical feature with a hit in one of the  
708 databases was inspected manually in order to evaluate the peak quality, using a  $m/z$  range allowing a mass



709 error of  $\pm 5$  ppm. For environmental samples, chemical features of interest were validated by checking for  
710 their presence in both LC-MS/MS run and three LC-MS runs. Each database hit was further confirmed at  
711 different levels according to Sumner *et al.* (2007) (Sumner et al., 2007). For both culture and environmental  
712 extracts, a level 1 identification was assigned when both the retention time and fragmentation pattern were  
713 matched with a commercial standard. In the absence of a commercial standard, a level 2 identification was  
714 assigned by matching the MS2 spectrum with spectra available in the literature or in the GNPS spectral  
715 library. A level 3 identification was assigned based on spectral similarities of the compound and a  
716 commercially available standard of an analog compound. In cases in which a MS2 was not detected in a  
717 given environmental sample, a hit was considered real only if the retention time and mass accuracy were  
718 within our tolerance levels ( $\pm 0.1$  min,  $\pm 5$  ppm error) and if either two adducts were detected and/or other  
719 members of the same family of compounds were also detected in the same sample, we consider such IDs  
720 level 2 or 3 depending on the availability of standard spectra. If a MS2 was not detected at all in any of the  
721 environmental samples, it was not considered a real hit even if it passed all the criteria above. Compounds  
722 of the polyene macrolides family, which are known for being unstable (5), were challenging to annotate due  
723 to their low peak height. For this reason, our criteria for polyene macrolides annotation in environmental  
724 samples were: retention time and mass accuracy within our tolerance levels ( $\pm 0.1$  min,  $\pm 5$  ppm error),  
725 presence of at least two adducts in one of the technical replicates, and presence of at least one adduct in  
726 two other technical replicates.

727

## 728 **Multi-locus Sequence Analysis (MLSA) and phylogenetic tree construction**

729 Four genes of selected microbial strains were partially sequenced (16S rRNA, gyrB, rpoB, atpD). Strains  
730 were grown in 5 mL of ISP2-broth at 30°C, 200 rpm for 1-7 days. Cultures were centrifuged at 5,000 rpm  
731 for 5 min, supernatant was removed, and the pellet was washed with double distilled water. Pellet was then  
732 extracted using the DNeasy Blood and Tissue kit (Qiagen, 69504) following the manufacturer's instructions  
733 for Gram-positive bacterial samples. The 16S rRNA gene was amplified using the 27F (5'-  
734 AGAGTTTGATCCTGGCTCAG-3') and 1492R (5'-GGTTACCTTGTTACGACTT-3') primers using  
735 parameters as follows: 98°C for 30 sec followed by 34 cycles of 98°C for 5 sec, 58°C for 30 sec, 72°C for  
736 45 sec, and finalized with 72°C for 5 min. Other genes were also amplified and sequenced: rpoB (primers:

737 5'-GAGCGCATGACCACCCAGGACGTCGAGGC-3' and 5'-CCTCGTAGTTGTGACCCTCCCACGGC  
738 ATGA-3), atpD (primers: 5'-GTCGCGGACTTCACCAAG GGCAAGGTGTTCAACACC-3' and 5'-GTGAAC  
739 TGCTTGGCGACGTGGGTGTTCTGGGACAGGAA-3) and gyrB (primers: 5'-GAGGTCGTGCTGAC  
740 CGTGCTGCACGCGGGCGGCAAGTTCGGC-3' and 5'-GTTGATGTGCTGGCCGTCGACGTGGGCGT  
741 CCGCCAT-3) following the same procedures, except that the annealing step was held at 70°C for 30  
742 seconds. All PCR reactions were performed using the Phusion Green Hot Start II High-Fidelity PCR Master  
743 Mix (Fisher Scientific, F566S). For reactions where gel extraction was necessary, the QIAquick Gel  
744 Extraction Kit (Qiagen, 28704) was used. The PCR or gel extracted products were sent for DNA cleanup  
745 and sequencing at the UCB DNA Sequencing Facility (<https://ucberkeleydnasequencing.com/>) using the  
746 same primers, with exception of gyrB (sequencing primers: 5'-GAGGTCGTGCTGACCGTGCTGCA-3' and  
747 5'-CGCTCCTTGCCTCGGCCTC-3). The resulting forward and reverse sequences were assembled and  
748 trimmed on Geneious R9 (Kearse et al., 2012) (allowing an error probability limit of 1%) to generate a  
749 consensus sequence. A BLAST search on GenBank (Sayers et al., 2020) was performed to find the closest  
750 related species. All trimmed sequences are available on GenBank (see **Supplementary File 1F - Table**  
751 **S6** for accession numbers). Consensus sequences of each gene were aligned separately with  
752 *Mycobacterium tuberculosis* H37RV respective gene (used as the outgroup) on Geneious 9.1.8 (Kearse et  
753 al., 2012) using MUSCLE (Edgar, 2004) default parameters, and trimmed at the same position in both ends.  
754 The four trimmed sequences obtained for the same strain were concatenated (gyrB-rpoB-16S-atpD). The  
755 final concatenated sequences of the 67 selected microbes plus *M. tuberculosis* H37RV were aligned again  
756 using the same parameters. This alignment was used to build a Maximum-likelihood phylogenetic tree using  
757 IQTree (Minh et al., 2020) with the best-fit model chosen as GTR+F+R4, and using 1,000 bootstrap repeats  
758 to estimate the robustness of the nodes. The tree was visualized, customized and annotated using the  
759 Interactive Tree of Life program (iTol) (Letunic & Bork, 2019) v. 5.6.3 (<https://itol.embl.de>). Trees including  
760 16S rRNA gene sequences from other studies were built in the same way, using the *Streptomyces*  
761 sequences deposited on GenBank (PopSet numbers: 1095870380, 702102129, 663498531, 1139695609).

762

763 **Heatmap, chemical dissimilarity dendrogram, and tanglegram analysis**

764 The heatmaps were plotted in Python using the Matplotlib library v 3.1.1. The chemical dissimilarity  
765 dendrogram was built using hierarchical cluster analysis (HCA) in Rstudio software v. 1.4.1103. First, the  
766 chemical features table was filtered to remove features detected in the blank samples (methanol and  
767 medium extract), then the remaining features were converted into a presence/absence format, using peak  
768 intensity higher than  $1.10^6$  as the threshold. A Jaccard distance matrix was generated using the Vegan  
769 package, 'vegdist' function (v. 2.5-7, <https://cran.r-project.org/web/packages/vegan/>). This matrix was used  
770 to build a dendrogram through a HCA, using the Cluster package (v. 2.1.1, [https://cran.r-](https://cran.r-project.org/web/packages/cluster/)  
771 [project.org/web/packages/cluster/](https://cran.r-project.org/web/packages/cluster/)), 'hclust' function with the 'average' agglomeration method (=   
772 Unweighted Pair Group Method with Arithmetic Mean). The chemical dissimilarity dendrogram was then  
773 compared in a tanglegram to the phylogenetic tree using the Dendextend package, 'tanglegram' function  
774 (v. 1.14.0, [cran.r-project.org/web/packages/dendextend/](https://cran.r-project.org/web/packages/dendextend/)). The generated tanglegram was untangled using  
775 the untangle function with the 'step2side' method, and the entanglement value was obtained using the  
776 'entanglement' function.

777

### 778 **Compound interaction assay**

779 Interaction between compounds was assessed using *M. anisopliae* P287 as an indicator. *M. anisopliae*  
780 P287 was grown on V8-juice-agar at 25°C under constant light for seven days, spores were collected with  
781 a loop, resuspended in 0.03% Tween80, and filtered through a cheesecloth. The concentration of spores  
782 in the inoculum was estimated using a hemocytometer and adjusted to  $3-5 \times 10^5$  spores/mL. In order to  
783 validate the spores count, dilutions of the spores solution were plated on PDA plates and incubated at 25°C  
784 under constant light for three days to count colony forming units (CFU). The assay was performed in a final  
785 volume of 100  $\mu$ L/well of 0.1xPDB+MOPS medium in 96-well plates, containing  $3-5 \times 10^4$  spores/mL.  
786 Selected compounds were tested alone and in pairwise combinations in seven biological replicates. The  
787 concentrations tested were as follows: actinomycin X2 and nactins: 15  $\mu$ g/mL, STA-21: 15  $\mu$ g/mL and 20  
788  $\mu$ g/mL, filipins: 2  $\mu$ g/mL and 4  $\mu$ g/mL. Antibiotic stocks solutions were prepared in DMSO and diluted in  
789 0.1xPDB+MOPS to a final concentration of 0.6% or 0.7% DMSO in the well. Solvent, solo inocula, and  
790 medium sterility controls were added separately into seven wells in a 96-well plate, each one becoming an  
791 independent replicate. The solvent control was composed of spores, medium and 0.6% or 0.7% DMSO;

792 the inoculum control (IC) was composed of spores in medium; and the medium sterility control (MC) was  
793 composed of medium only. Plates were incubated at 30°C for 48h. At this time 0.002% (w/v) of the redox  
794 indicator resazurin was added (prepared in double-distilled H<sub>2</sub>O and filter-sterilized), and plates were  
795 incubated again for another 24h. Fluorescence of the redox indicator was measured at 570 nm and 615 nm  
796 for excitation and emission, respectively, using a plate reader (SpectraMax i3x, Molecular Devices).  
797 The type of compound interaction was determined by calculating the Bliss predicted value for independent  
798 effect ( $E_{AB,Bliss}$ ) and Bliss excess ( $b$ ) followed by a t-test using a method described elsewhere (Folkesson et  
799 al., 2020) with some modifications. The effect of each treatment was evaluated calculating the fractional  
800 inhibition (FI) when compared to the inoculum control.

801

$$802 \quad FI = 1 - (T_F - MC_F) / (IC_F - MC_F)$$

803

804  $T_F$ : Fluorescence intensity of the treatment

805  $MC_F$ : Fluorescence intensity of the medium control

806  $IC_F$ : Fluorescence intensity of the inoculum control

807

808 The percentage of inhibition was calculated by multiplying the FI by 100. The type of compound interactions  
809 was divided into three categories: synergistic, antagonistic and additive, and it was determined using the  
810 Bliss Independence model following the methods described elsewhere (Folkesson et al., 2020) with some  
811 modifications. Since we chose to report our data based on the observed growth inhibition and not survival,  
812 the formula was adjusted according to the Bliss Independence model (Bliss, 1939). Therefore, the Bliss  
813 expected value for an independent (additive) effect ( $E_{AB,BLISS}$ ) and Bliss excess ( $b$ ) were calculated as  
814 follows:

815

$$816 \quad E_{AB,Bliss} = FI_A + FI_B - FI_A FI_B \quad b = E_{AB,BLISS} - FI_{AB}$$

817

818 A and B represent the compounds tested ( $FI_A$  and  $FI_B$ : compounds tested alone,  $FI_{AB}$ : compounds tested  
819 in combination). Therefore,  $E_{AB,BLISS}$  represents the expected FI value if the compounds have an additive  
820 effect (according to Bliss Independence model), whereas  $FI_{AB}$  represents the actual value observed when  
821 compounds were tested in combination.

822 The  $E_{AB,Bliss}$  was calculated using the replicates of each compound in all possible combinations, generating  
823 several FI expected values for each compound pairwise combination. On the other hand, the Bliss excess  
824 was calculated using average numbers. A t-test was performed to compare the means of  $E_{AB,Bliss}$  and  $FI_{AB}$ .  
825 Pairwise combinations with  $b \geq 0.08$ ,  $0.08 \leq b \leq -0.08$  and  $b \leq -0.08$  were classified as synergistic, additive  
826 and antagonistic, respectively, when the  $p$ -value was  $\leq 0.05$ .

827

### 828 **Interaction on frass assay**

829 Pieces of frass (3 mg) were placed inside 200  $\mu$ L-microtubes, autoclaved and oven-dried. Spores of  
830 selected microbes were inoculated in 15  $\mu$ L ( $0.4$ - $2.8 \times 10^3$  CFU of each microbe per microtube) in different  
831 combinations. Each combination was tested separately in eight different microtubes (biological replicates):  
832 1) a single microbe per tube, 2) one streptomycete + *M. anisopliae*, 3) two streptomycetes. Each microbe  
833 was also added to empty microtubes as a growth control, and some microtubes containing frass were  
834 inoculated with sterile water as a sterility control. In the case of multiple microbes per tube, spores of each  
835 microbe were pre-mixed before adding them to the frass. Therefore, each treatment had its own initial  
836 inoculum, which was plated to verify the exact initial concentration of each microbe in each treatment by  
837 CFU count. All tubes were vortexed for 3 seconds and spun down for another 3 seconds. Microtubes were  
838 then incubated at 30°C for one week. After the incubation time, 100  $\mu$ L of a solution of 0.03% of Tween80  
839 was added to each tube and vortexed for 30 sec, left at RT for 1h, and vortexed again for another 30 sec  
840 to detach cells from the frass. An aliquot of each tube was serially diluted and plated for CFU count. The  
841 rest of the material was extracted with ethyl acetate (aqueous phase) and methanol (frass material). Crude  
842 extracts were submitted for metabolomics analysis using the same pipeline described above. In both cases  
843 of initial and final CFU counts, *M. anisopliae* counts were performed using PDA plates supplemented with  
844 apramycin (25  $\mu$ g/mL) to suppress the growth of the co-inoculated streptomycete, and streptomycetes  
845 counts were performed using ISP2-agar plates.

846

847 **Acknowledgments**

848           We wish to thank the staff at Rock Creek and Jean Lafitte national parks for granting us the  
849 permission to collect samples inside the parks; Michael E. Rush, Terry Presswood, Theresa Presswood  
850 and Janice Tharaldson for granting us access to their private properties and for the support given during  
851 sample collection; Daniel and Robbie Williams, and their family, especially Caden Williams, for helping us  
852 locate and collect preliminary samples on their land; and Cindy Pino, Vineetha Zacharia and Carlos E. R.  
853 Machado for their support during the fieldwork. Part of this work was performed at Lawrence Berkeley  
854 National Laboratory under US Department of Energy contract number DE-AC02-05CH11231.

855

856

857

858 **Competing Interest Statement:** The authors declare no competing interests.

859

860 **REFERENCES**

- 861
- 862 Barra Caracciolo, A., Topp, E., & Grenni, P. (2015). Pharmaceuticals in the environment: Biodegradation  
863 and effects on natural microbial communities. A review. *Journal of Pharmaceutical and Biomedical*  
864 *Analysis*, 106(15), 25–36. <https://doi.org/10.1016/j.jpba.2014.11.040>
- 865 Batey, S. F. D., Greco, C., Hutchings, M. I., & Wilkinson, B. (2020). Chemical warfare between fungus-  
866 growing ants and their pathogens. *Current Opinion in Chemical Biology*, 59, 172–181.
- 867 Behie, S. W., Bonet, B., Zacharia, V. M., McClung, D. J., & Traxler, M. F. (2017). Molecules to ecosystems:  
868 Actinomycete natural products in situ. *Frontiers in Microbiology*, 17(7), 2149.  
869 <https://doi.org/10.3389/fmicb.2016.02149>
- 870 Benndorf, R., Guo, H., Sommerwerk, E., Weigel, C., Garcia-Altare, M., Martin, K., Hu, H., Kűfner, M., de  
871 Beer, Z. W., Poulsen, M., & Beemelmans, C. (2018). Natural products from actinobacteria associated  
872 with fungus-growing termites. *Antibiotics*, 7(3), 83. <https://doi.org/10.3390/antibiotics7030083>
- 873 Biedermann, P. H. W., & Nuotclà, J. A. (2020). Social Beetles. In *Encyclopedia of Social Insects*.  
874 [https://doi.org/10.1007/978-3-319-90306-4\\_108-1](https://doi.org/10.1007/978-3-319-90306-4_108-1)
- 875 Bliss, C. I. (1939). The toxicity of poisons applied jointly. *Annals of Applied Biology*, 26(3), 585–615.  
876 <https://doi.org/10.1111/j.1744-7348.1939.tb06990.x>
- 877 Blodgett, J. A. V., Oh, D. C., Cao, S., Currie, C. R., Kolter, R., & Clardy, J. (2010). Common biosynthetic  
878 origins for polycyclic tetramate macrolactams from phylogenetically diverse bacteria. *Proceedings of*  
879 *the National Academy of Sciences of the United States of America*, 107(26), 11692–11697.  
880 <https://doi.org/10.1073/pnas.1001513107>
- 881 Book, A. J., Lewin, G. R., McDonald, B. R., Takasuka, T. E., Doering, D. T., Adams, A. S., Blodgett, J. A.  
882 V., Clardy, J., Raffa, K. F., Fox, B. G., & Currie, C. R. (2014). Cellulolytic *Streptomyces* strains  
883 associated with herbivorous insects share a phylogenetically linked capacity to degrade  
884 lignocellulose. *Applied and Environmental Microbiology*, 80(15), 4692–4701.  
885 <https://doi.org/10.1128/AEM.01133-14>
- 886 Book, A. J., Lewin, G. R., McDonald, B. R., Takasuka, T. E., Wendt-Pienkowski, E., Doering, D. T., Suh,  
887 S., Raffa, K. F., Fox, B. G., & Currie, C. R. (2016). Evolution of High Cellulolytic Activity in Symbiotic  
888 *Streptomyces* through Selection of Expanded Gene Content and Coordinated Gene Expression.  
889 *PLoS Biology*, 14(6), e1002475. <https://doi.org/10.1371/journal.pbio.1002475>
- 890 Boreen, A. L., Arnold, W. A., & McNeill, K. (2004). Photochemical fate of sulfa drugs in then aquatic  
891 environment: Sulfa drugs containing five-membered heterocyclic groups. *Environmental Science and*  
892 *Technology*, 38(14), 3933–3940. <https://doi.org/10.1021/es0353053>
- 893 Bratburd, J. R., Arango, R. A., & Horn, H. A. (2020). Defensive symbioses in social insects can inform  
894 human health and agriculture. *Frontiers in Microbiology*, 11, 76.  
895 <https://doi.org/10.3389/fmicb.2020.00076>
- 896 Buchfink, B., Xie, C., & Huson, D. H. (2014). Fast and sensitive protein alignment using DIAMOND. *Nature*

- 897 *Methods*, 12, 59–60. <https://doi.org/10.1038/nmeth.3176>
- 898 Cafaro, M. J., Poulsen, M., Little, A. E. F., Price, S. L., Gerardo, N. M., Wong, B., Stuart, A. E., Larget, B.,  
899 Abbot, P., & Currie, C. R. (2011). Specificity in the symbiotic association between fungus-growing  
900 ants and protective *Pseudonocardia* bacteria. *Proceedings of the Royal Society B: Biological*  
901 *Sciences*, 278(1713), 1814–1822. <https://doi.org/10.1098/rspb.2010.2118>
- 902 Ceja-Navarro, J. A., Karaoz, U., Bill, M., Hao, Z., White, R. A., Arellano, A., Ramanculova, L., Filley, T. R.,  
903 Berry, T. D., Conrad, M. E., Blackwell, M., Nicora, C. D., Kim, Y. M., Reardon, P. N., Lipton, M. S.,  
904 Adkins, J. N., Pett-Ridge, J., & Brodie, E. L. (2019). Gut anatomical properties and microbial functional  
905 assembly promote lignocellulose deconstruction and colony subsistence of a wood-feeding beetle.  
906 *Nature Microbiology*, 4(5), 864–875. <https://doi.org/10.1038/s41564-019-0384-y>
- 907 Ceja-Navarro, J. A., Nguyen, N. H., Karaoz, U., Gross, S. R., Herman, D. J., Andersen, G. L., Bruns, T. D.,  
908 Pett-Ridge, J., Blackwell, M., & Brodie, E. L. (2014). Compartmentalized microbial composition,  
909 oxygen gradients and nitrogen fixation in the gut of *Odontotaenius disjunctus*. *ISME Journal*, 8(1), 6–  
910 18. <https://doi.org/10.1038/ismej.2013.134>
- 911 Chait, R., Craney, A., & Kishony, R. (2007). Antibiotic interactions that select against resistance. *Nature*,  
912 446(7136), 668–671. <https://doi.org/10.1038/nature05685>
- 913 Charlop-Powers, Z., Owen, J. G., Reddy, B. V. B., Ternei, M., Guimaraes, D. O., De Frias, U. A., Pupo, M.  
914 T., Seepe, P., Feng, Z., & Brady, S. F. (2015). Global biogeographic sampling of bacterial secondary  
915 metabolism. *ELife*, 4, e05048. <https://doi.org/10.7554/eLife.05048>
- 916 Chevrette, M. G., Carlson, C. M., Ortega, H. E., Thomas, C., Ananiev, G. E., Barns, K. J., Book, A. J.,  
917 Cagnazzo, J., Carlos, C., Flanigan, W., Grubbs, K. J., Horn, H. A., Hoffmann, F. M., Klassen, J. L.,  
918 Knack, J. J., Lewin, G. R., McDonald, B. R., Muller, L., Melo, W. G. P., ... Currie, C. R. (2019). The  
919 antimicrobial potential of *Streptomyces* from insect microbiomes. *Nature Communications*, 10(1).  
920 <https://doi.org/10.1038/s41467-019-08438-0>
- 921 Chevrette, M. G., & Currie, C. R. (2019). Emerging evolutionary paradigms in antibiotic discovery. *Journal*  
922 *of Industrial Microbiology and Biotechnology*, 46(3–4), 257–271. [https://doi.org/10.1007/s10295-018-](https://doi.org/10.1007/s10295-018-2085-6)  
923 2085-6
- 924 Choudoir, M. J., Doroghazi, J. R., & Buckley, D. H. (2016). Latitude delineates patterns of biogeography in  
925 terrestrial *Streptomyces*. *Environmental Microbiology*, 18(12), 4931–4945.  
926 <https://doi.org/10.1111/1462-2920.13420>
- 927 Colavecchio, A., Cadieux, B., Lo, A., & Goodridge, L. D. (2017). Bacteriophages contribute to the spread  
928 of antibiotic resistance genes among foodborne pathogens of the Enterobacteriaceae family - A  
929 review. *Frontiers in Microbiology*, 8, 1108. <https://doi.org/10.3389/fmicb.2017.01108>
- 930 Currie, C. R., Wong, B., Stuart, A. E., Schultz, T. R., Rehner, S. A., Mueller, U. G., Sung, G. H., Spatafora,  
931 J. W., & Straus, N. A. (2003). Ancient tripartite coevolution in the attine ant-microbe symbiosis.  
932 *Science*, 299(5605), 386–388. <https://doi.org/10.1126/science.1078155>
- 933 Cycoń, M., Mroziak, A., & Piotrowska-Seget, Z. (2019). Antibiotics in the soil environment—degradation and



- 934 their impact on microbial activity and diversity. *Frontiers in Microbiology*, 10, 338.  
935 <https://doi.org/10.3389/fmicb.2019.00338>
- 936 Debois, D., Jourdan, E., Smargiasso, N., Thonart, P., De Pauw, E., & Ongena, M. (2014). Spatiotemporal  
937 monitoring of the anti-biome secreted by *Bacillus* biofilms on plant roots using MALDI mass  
938 spectrometry imaging. *Analytical Chemistry*, 86(9), 4431–4438. <https://doi.org/10.1021/ac500290s>
- 939 Edgar, R. C. (2004). MUSCLE: Multiple sequence alignment with high accuracy and high throughput.  
940 *Nucleic Acids Research*, 32(5), 1792–1797. <https://doi.org/10.1093/nar/gkh340>
- 941 Edlund, B. L., Arnold, W. A., & McNeill, K. (2006). Aquatic photochemistry of nitrofurantoin antibiotics.  
942 *Environmental Science and Technology*, 40(17), 5422–5427. <https://doi.org/10.1021/es0606778>
- 943 El-Naggar, M. Y., El-Kersh, M. A., & El-Sharaky, A. S. (1999). Correlation of actinomycin X2 to the lipid  
944 profile in static and shaken cultures of *Streptomyces nasri* strain YG62. *Microbios*, 100(396), 117–  
945 127.
- 946 Engl, T., Kroiss, J., Kai, M., Nechitaylo, T. Y., Svatoš, A., & Kaltenpoth, M. (2018). Evolutionary stability of  
947 antibiotic protection in a defensive symbiosis. *Proceedings of the National Academy of Sciences of*  
948 *the United States of America*, 115(9), E2020–E2029. <https://doi.org/10.1073/pnas.1719797115>
- 949 Folkesson, E., Niederdorfer, B., Nakstad, V. T., Thommesen, L., Klinkenberg, G., Lægreid, A., & Flobak,  
950 Å. (2020). High-throughput screening reveals higher synergistic effect of MEK inhibitor combinations  
951 in colon cancer spheroids. *Scientific Reports*, 10, 11574. [https://doi.org/10.1038/s41598-020-68441-](https://doi.org/10.1038/s41598-020-68441-0)  
952 0
- 953 Gao, H., Gruschow, S., Barke, J., Seipke, R. F., Hill, L. M., Orivel, J., Yu, D. W., Hutchings, M., & Goss, R.  
954 J. M. (2014). Filipins: The first antifungal “weed killers” identified from bacteria isolated from the trap-  
955 ant. *RSC Advances*, 4(100), 57267–57270. <https://doi.org/10.1039/c4ra09875g>
- 956 Gholami-Shabani, M., Shams-Ghahfarokhi, M., & Razzaghi-Abyaneh, M. (2019). Natural product synthesis  
957 by fungi: recent trends and future prospects. In A. Yadav, S. Singh, S. Mishra, & A. Gupta (Eds.),  
958 *Recent Advancement in White Biotechnology Through Fungi* (pp. 195–228). Springer, Cham.  
959 [https://doi.org/10.1007/978-3-030-14846-1\\_7](https://doi.org/10.1007/978-3-030-14846-1_7)
- 960 Gothwal, R., & Shashidhar, T. (2015). Antibiotic pollution in the environment: A review. *Clean - Soil, Air,*  
961 *Water*, 43(4), 479–489. <https://doi.org/10.1002/clen.201300989>
- 962 Gray, I. E. (1946). Observations on the life history of the horned passalus. *American Midland Naturalist*,  
963 35(3), 728. <https://doi.org/10.2307/2421554>
- 964 Grenni, P., Ancona, V., & Barra Caracciolo, A. (2018). Ecological effects of antibiotics on natural  
965 ecosystems: A review. *Microchemical Journal*, 136, 25–39.  
966 <https://doi.org/10.1016/j.microc.2017.02.006>
- 967 Grubbs, K. J., Surup, F., Biedermann, P. H. W., McDonald, B. R., Klassen, J. L., Carlson, C. M., Clardy, J.,  
968 & Currie, C. R. (2020). Cycloheximide-Producing *Streptomyces* Associated With *Xyleborinus*  
969 *saxesenii* and *Xyleborus affinis* Fungus-Farming Ambrosia Beetles. *Frontiers in Microbiology*, 11,  
970 562140. <https://doi.org/10.3389/fmicb.2020.562140>

- 971 Guo, Y. P., Zheng, W., Rong, X. Y., & Huang, Y. (2008). A multilocus phylogeny of the *Streptomyces*  
972 *griseus* 16S rRNA gene clade: Use of multilocus sequence analysis for streptomycete systematics.  
973 *International Journal of Systematic and Evolutionary Microbiology*, 58(1), 149–159.  
974 <https://doi.org/10.1099/ijs.0.65224-0>
- 975 Hamill, R. L., Higgins, C. E., Boaz, H. E., & Gorman, M. (1969). The structure of beauvericin, a new  
976 depsipeptide antibiotic toxic to *artemia salina*. *Tetrahedron Letters*, 10(49), 4255–4258.  
977 [https://doi.org/10.1016/S0040-4039\(01\)88668-8](https://doi.org/10.1016/S0040-4039(01)88668-8)
- 978 Hollstein, U. (1974). Actinomycin. Chemistry and mechanism of action. *Chemical Reviews*, 74(6), 625–652.  
979 <https://doi.org/10.1021/cr60292a002>
- 980 Huson, D. H., Albrecht, B., Bağci, C., Bessarab, I., Górska, A., Jolic, D., & Williams, R. B. H. (2018).  
981 MEGAN-LR: New algorithms allow accurate binning and easy interactive exploration of metagenomic  
982 long reads and contigs. *Biology Direct*, 13, 6. <https://doi.org/10.1186/s13062-018-0208-7>
- 983 Hutchings, M., Truman, A., & Wilkinson, B. (2019). Antibiotics: past, present and future. *Current Opinion in*  
984 *Microbiology*, 51, 72–80. <https://doi.org/10.1016/j.mib.2019.10.008>
- 985 Jiang, S., Piao, C., Yu, Y., Cao, P., Li, C., Yang, F., Li, M., Xiang, W., & Liu, C. (2018). *Streptomyces*  
986 *capitiformicae* sp. nov., a novel actinomycete producing angucyclinone antibiotics isolated from the  
987 head of *Camponotus japonicus* Mayr. *International Journal of Systematic and Evolutionary*  
988 *Microbiology*, 68(1), 118–124. <https://doi.org/10.1099/ijsem.0.002468>
- 989 Kaltenpoth, M., Goettler, W., Dale, C., Stubblefield, J. W., Herzner, G., Roeser-Mueller, K., & Strohm, E.  
990 (2006). “Candidatus *Streptomyces philanthi*”, an endosymbiotic streptomycete in the antennae of  
991 *Philanthus digger* wasps. *International Journal of Systematic and Evolutionary Microbiology*, 56(6),  
992 1403–1411. <https://doi.org/10.1099/ijs.0.64117-0>
- 993 Kaltenpoth, M., Göttler, W., Herzner, G., & Strohm, E. (2005). Symbiotic bacteria protect wasp larvae from  
994 fungal infestation. *Current Biology*, 15(5), 475–479. <https://doi.org/10.1016/j.cub.2004.12.084>
- 995 Kaltenpoth, M., Roeser-Mueller, K., Koehler, S., Peterson, A., Nechitaylo, T. Y., Stubblefield, J. W.,  
996 Herzner, G., Seger, J., & Strohm, E. (2014). Partner choice and fidelity stabilize coevolution in a  
997 Cretaceous-age defensive symbiosis. *Proceedings of the National Academy of Sciences of the United*  
998 *States of America*, 111(17), 6359–6364. <https://doi.org/10.1073/pnas.1400457111>
- 999 Kaltenpoth, M., Schmitt, T., Polidori, C., Koedam, D., & Strohm, E. (2010). Symbiotic streptomycetes in  
1000 antennal glands of the South American digger wasp genus *Trachypus* (Hymenoptera, Crabronidae).  
1001 *Physiological Entomology*, 35(2), 196–200. <https://doi.org/10.1111/j.1365-3032.2010.00729.x>
- 1002 Kaltenpoth, M., Strupat, K., & Svatoš, A. (2016). Linking metabolite production to taxonomic identity in  
1003 environmental samples by (MA)LDI-FISH. *ISME Journal*, 10(2), 527–531.  
1004 <https://doi.org/10.1038/ismej.2015.122>
- 1005 Kaltenpoth, M., Yildirim, E., Gürbüz, M. F., Herzner, G., & Strohm, E. (2012). Refining the roots of the  
1006 beewolf-streptomycetes symbiosis: Antennal symbionts in the rare genus *Philanthinus* (Hymenoptera,  
1007 Crabronidae). *Applied and Environmental Microbiology*, 78(3), 822–827.

- 1008 <https://doi.org/10.1128/AEM.06809-11>
- 1009 Kearse, M., Moir, R., Wilson, A., Stones-Havas, S., Cheung, M., Sturrock, S., Buxton, S., Cooper, A.,  
1010 Markowitz, S., Duran, C., Thierer, T., Ashton, B., Meintjes, P., & Drummond, A. (2012). Geneious  
1011 Basic: An integrated and extendable desktop software platform for the organization and analysis of  
1012 sequence data. *Bioinformatics*, *28*(12), 1647–1649. <https://doi.org/10.1093/bioinformatics/bts199>
- 1013 Kellner, R. L. L., & Dettner, K. (1995). Allocation of pederin during lifetime of *Paederus* rove beetles  
1014 (Coleoptera: Staphylinidae): Evidence for polymorphism of hemolymph toxin. *Journal of Chemical*  
1015 *Ecology*, *21*(11), 1719–1733. <https://doi.org/10.1007/BF02033672>
- 1016 Kirby, W. M. M., Hudson, D. G., & Noyes, W. D. (1956). Clinical and Laboratory Studies of Novobiocin, a  
1017 New Antibiotic. *A.M.A. Archives of Internal Medicine*, *98*(1), 1–7.  
1018 <https://doi.org/10.1001/archinte.1956.00250250007001>
- 1019 Kominek, L. A. (1975). Cycloheximide production by *Streptomyces griseus*: control mechanisms of  
1020 cycloheximide biosynthesis. *Antimicrob. Agents Chemother.*, *7*(6), 856–860.  
1021 <https://doi.org/10.1128/AAC.7.6.856>
- 1022 Kroiss, J., Kaltenpoth, M., Schneider, B., Schwinger, M. G., Hertweck, C., Maddula, R. K., Strohm, E., &  
1023 Svatos, A. (2010). Symbiotic streptomycetes provide antibiotic combination prophylaxis for wasp  
1024 offspring. *Nature Chemical Biology*, *6*(4), 261–263. <https://doi.org/10.1038/nchembio.331>
- 1025 Laatsch, H. (2012). *Antibase 2012 – The natural compound identifier*. Wiley-VCH. [http://www.wiley-](http://www.wiley-vch.de/stmdata/antibase.php)  
1026 [vch.de/stmdata/antibase.php](http://www.wiley-vch.de/stmdata/antibase.php)
- 1027 Lekshmi, M., Ammini, P., Kumar, S., & Varela, M. F. (2017). The food production environment and the  
1028 development of antimicrobial resistance in human pathogens of animal origin. *Microorganisms*, *5*(1),  
1029 11. <https://doi.org/10.3390/microorganisms5010011>
- 1030 Lemetre, C., Maniko, J., Charlop-Powers, Z., Sparrow, B., Lowe, A. J., & Brady, S. F. (2017). Bacterial  
1031 natural product biosynthetic domain composition in soil correlates with changes in latitude on a  
1032 continent-wide scale. *Proceedings of the National Academy of Sciences of the United States of*  
1033 *America*, *114*(44), 11615–11620. <https://doi.org/10.1073/pnas.1710262114>
- 1034 Letunic, I., & Bork, P. (2019). Interactive Tree of Life (iTOL) v4: Recent updates and new developments.  
1035 *Nucleic Acids Research*, *47*(W1), W256-259. <https://doi.org/10.1093/nar/gkz239>
- 1036 Li, H., Sosa-Calvo, J., Horn, H. A., Pupo, M. T., Clardy, J., Rabeling, C., Schultz, T. R., & Currie, C. R.  
1037 (2018). Convergent evolution of complex structures for ant-bacterial defensive symbiosis in fungus-  
1038 farming ants. *Proceedings of the National Academy of Sciences of the United States of America*,  
1039 *115*(42), 10720–10725. <https://doi.org/10.1073/pnas.1809332115>
- 1040 Logrieco, A., Moretti, A., Castella, G., KostECKI, M., Golinski, P., Ritieni, A., & Chelkowski, J. (1998).  
1041 Beauvericin production by *Fusarium* species. *Applied and Environmental Microbiology*, *64*(8), 3084–  
1042 3088. <https://doi.org/10.1128/aem.64.8.3084-3088.1998>
- 1043 Lyu, H. N., Liu, H. W., Keller, N. P., & Yin, W. B. (2020). Harnessing diverse transcriptional regulators for  
1044 natural product discovery in fungi. *Natural Product Reports*, *37*(1), 6–16.

- 1045 <https://doi.org/10.1039/c8np00027a>
- 1046 Mahmoudi, N., de Julián-Ortiz, J. V., Ciceron, L., Gálvez, J., Mazier, D., Danis, M., Derouin, F., & García-  
1047 Domenech, R. (2006). Identification of new antimalarial drugs by linear discriminant analysis and  
1048 topological virtual screening. *Journal of Antimicrobial Chemotherapy*, *57*(3), 489–497.  
1049 <https://doi.org/10.1093/jac/dki470>
- 1050 Mason, W. H., & Odum, E. P. (1969). The effect of coprophagy on retention and bioelimination of  
1051 radionuclides by detritus feeding animals. In D. J. Nelson & C. E. Francis (Eds.), *Second National*  
1052 *Symposium on Radioecology* (pp. 721–724).
- 1053 Matarrita-Carranza, B., Moreira-Soto, R. D., Murillo-Cruz, C., Mora, M., Currie, C. R., & Pinto-Tomas, A. A.  
1054 (2017). Evidence for widespread associations between neotropical hymenopteran insects and  
1055 Actinobacteria. *Frontiers in Microbiology*, *8*, 2016. <https://doi.org/10.3389/fmicb.2017.02016>
- 1056 McDonald, B., Chevrette, M., Klassen, J., Horn, H., Caldera, E., Wendt-Pienkowski, E., Cafaro, M., Ruzzini,  
1057 A., Van Arnam, E., Weinstock, G., Gerardo, N., Poulsen, M., Suen, G., Clardy, J., & Currie, C. (2019).  
1058 Biogeography and Microscale Diversity Shape the Biosynthetic Potential of Fungus-growing Ant-  
1059 associated Pseudonocardia. In *bioRxiv*. <https://doi.org/10.1101/545640>
- 1060 Menegatti, C., Fukuda, T. T. H., & Pupo, M. T. (2020). Chemical ecology in insect-microbe interactions in  
1061 the neotropics. *Planta Medica*. <https://doi.org/10.1055/a-1229-9435>
- 1062 Mevers, E., Chouvenc, T., Su, N. Y., & Clardy, J. (2017). Chemical interaction among termite-associated  
1063 microbes. *Journal of Chemical Ecology*, *43*(11–12), 1078–1085. [https://doi.org/10.1007/s10886-017-](https://doi.org/10.1007/s10886-017-0900-6)  
1064 [0900-6](https://doi.org/10.1007/s10886-017-0900-6)
- 1065 Minh, B. Q., Schmidt, H. A., Chernomor, O., Schrempf, D., Woodhams, M. D., von Haeseler, A., & Lanfear,  
1066 R. (2020). IQ-TREE 2: New models and efficient methods for phylogenetic inference in the genomic  
1067 era. *Molecular Biology and Evolution*, *37*(5), 1530–1534. <https://doi.org/10.1093/molbev/msaa015>
- 1068 Mitchell, S. M., Ullman, J. L., Teel, A. L., & Watts, R. J. (2014). pH and temperature effects on the hydrolysis  
1069 of three  $\beta$ -lactam antibiotics: Ampicillin, cefalotin and cefoxitin. *Science of the Total Environment*, *466–*  
1070 *467*, 547–555. <https://doi.org/10.1016/j.scitotenv.2013.06.027>
- 1071 Moree, W. J., McConnell, O. J., Nguyen, D. D., Sanchez, L. M., Yang, Y. L., Zhao, X., Liu, W. T., Boudreau,  
1072 P. D., Srinivasan, J., Atencio, L., Ballesteros, J., Gavilán, R. G., Torres-Mendoza, D., Guzmán, H. M.,  
1073 Gerwick, W. H., Gutiérrez, M., & Dorrestein, P. C. (2014). Microbiota of healthy corals are active  
1074 against fungi in a light-dependent manner. *ACS Chemical Biology*, *9*(10), 2300–2308.  
1075 <https://doi.org/10.1021/cb500432j>
- 1076 Nguyen, N. H., Suh, S. O., Marshall, C. J., & Blackwell, M. (2006). Morphological and ecological similarities:  
1077 wood-boring beetles associated with novel xylose-fermenting yeasts, *Spathaspora passalidarum* gen.  
1078 sp. nov. and *Candida jeffriesii* sp. nov. *Mycological Research*, *110*(10), 1232–1241.  
1079 <https://doi.org/10.1016/j.mycres.2006.07.002>
- 1080 Oh, D. C., Poulsen, M., Currie, C. R., & Clardy, J. (2009). Dentigerumycin: A bacterial mediator of an ant-  
1081 fungus symbiosis. *Nature Chemical Biology*, *5*(6), 391–393. <https://doi.org/10.1038/nchembio.159>

- 1082 Oka, M., Kamei, H., Hamagishi, Y., Tomita, K., Miyaki, T., Konishi, M., & Oki, T. (1990). Chemical and  
1083 biological properties of rubiginone, a complex of new antibiotics with vincristine-cytotoxicity  
1084 potentiating activity. *The Journal of Antibiotics*, 43(8), 967–976.  
1085 <https://doi.org/10.7164/antibiotics.43.967>
- 1086 Olano, C., García, I., González, A., Rodríguez, M., Rozas, D., Rubio, J., Sánchez-Hidalgo, M., Braña, A.  
1087 F., Méndez, C., & Salas, J. A. (2014). Activation and identification of five clusters for secondary  
1088 metabolites in *Streptomyces albus* J1074. *Microbial Biotechnology*, 7(3), 242–256.  
1089 <https://doi.org/10.1111/1751-7915.12116>
- 1090 Onchuru, T. O., Javier Martinez, A., Ingham, C. S., & Kaltenpoth, M. (2018). Transmission of mutualistic  
1091 bacteria in social and gregarious insects. *Current Opinion in Insect Science*, 28, 50–58.  
1092 <https://doi.org/10.1016/j.cois.2018.05.002>
- 1093 Ortega, H. E., Ferreira, L. L. G., Melo, W. G. P., Oliveira, A. L. L., Alvarenga, R. F. R., Lopes, N. P., Bugni,  
1094 T. S., Andricopulo, A. D., & Pupo, M. T. (2019). Antifungal compounds from *Streptomyces* associated  
1095 with attine ants also inhibit *Leishmania donovani*. *PLoS Neglected Tropical Diseases*, 13(8),  
1096 e0007643. <https://doi.org/10.1371/journal.pntd.0007643>
- 1097 Pearse, A. S., Patterson, M. T., Rankin, J. S., & Wharton, G. W. (1936). The ecology of *Passalus cornutus*  
1098 Fabricius, a beetle which lives in rotting logs. *Ecological Monographs*, 6(4), 455–490.  
1099 <https://doi.org/10.2307/1943239>
- 1100 Pessotti, R. D. C., Hansen, B. L., Zacharia, V. M., Polyakov, D., & Traxler, M. F. (2019). High spatial  
1101 resolution imaging mass spectrometry reveals chemical heterogeneity across bacterial microcolonies.  
1102 *Analytical Chemistry*, 91(23), 14818–14823. <https://doi.org/10.1021/acs.analchem.9b03909>
- 1103 Poulsen, M., Oh, D. C., Clardy, J., & Currie, C. R. (2011). Chemical analyses of wasp-associated  
1104 *Streptomyces* bacteria reveal a prolific potential for natural products discovery. *PLoS ONE*, 6(2),  
1105 e16763. <https://doi.org/10.1371/journal.pone.0016763>
- 1106 Protasov, E. S., Axenov-Gribanov, D. V., Rebets, Y. V., Voytsekhovskaya, I. V., Tokovenko, B. T., Shatilina,  
1107 Z. M., Luzhetskyy, A. N., & Timofeyev, M. A. (2017). The diversity and antibiotic properties of  
1108 actinobacteria associated with endemic deepwater amphipods of Lake Baikal. *Antonie van*  
1109 *Leeuwenhoek, International Journal of General and Molecular Microbiology*, 110(12), 1593–1611.  
1110 <https://doi.org/10.1007/s10482-017-0910-y>
- 1111 Richardson, L. A. (2017). Understanding and overcoming antibiotic resistance. *PLoS Biology*, 15(8),  
1112 e2003775. <https://doi.org/10.1371/journal.pbio.2003775>
- 1113 Sayers, E. W., Cavanaugh, M., Clark, K., Ostell, J., Pruitt, K. D., & Karsch-Mizrachi, I. (2020). GenBank.  
1114 *Nucleic Acids Research*, 48(D1), D84–86. <https://doi.org/10.1093/nar/gkz956>
- 1115 Schlatter, D. C., & Kinkel, L. L. (2014). Global biogeography of *Streptomyces* antibiotic inhibition,  
1116 resistance, and resource use. *FEMS Microbiology Ecology*, 88(2), 386–397.  
1117 <https://doi.org/10.1111/1574-6941.12307>
- 1118 Schoenian, I., Spittler, M., Ghaste, M., Wirth, R., Herz, H., & Spittler, D. (2011). Chemical basis of the

- 1119 synergism and antagonism in microbial communities in the nests of leaf-cutting ants. *Proceedings of*  
1120 *the National Academy of Sciences of the United States of America*, 108(5), 1955–1960.  
1121 <https://doi.org/10.1073/pnas.1008441108>
- 1122 Schuster, J. C., & Schuster, L. B. (1985). Social behavior in passalid beetles (Coleoptera: Passalidae):  
1123 cooperative brood care. *The Florida Entomologist*, 68(2), 266–272. <https://doi.org/10.2307/3494359>
- 1124 Scott, J. J., Oh, D. C., Yuceer, M. C., Klepzig, K. D., Clardy, J., & Currie, C. R. (2008). Bacterial protection  
1125 of beetle-fungus mutualism. *Science*, 322(5898), 63. <https://doi.org/10.1126/science.1160423>
- 1126 Seipke, R. F., Barke, J., Brearley, C., Hill, L., Yu, D. W., Goss, R. J. M., & Hutchings, M. I. (2011). A single  
1127 *Streptomyces* symbiont makes multiple antifungals to support the fungus farming ant *acromyrmex*  
1128 *octospinosus*. *PLoS ONE*, 6(8), e22028. <https://doi.org/10.1371/journal.pone.0022028>
- 1129 Shih, H. Der, Liu, Y. C., Hsu, F. L., Mulabagal, V., Dodda, R., & Huang, J. W. (2003). Fungichromin: A  
1130 substance from *Streptomyces padanus* with inhibitory effects on *Rhizoctonia solani*. *Journal of*  
1131 *Agricultural and Food Chemistry*, 51(1), 95–99. <https://doi.org/10.1021/jf025879b>
- 1132 Sit, C. S., Ruzzini, A. C., Van Arnam, E. B., Ramadhar, T. R., Currie, C. R., & Clardy, J. (2015). Variable  
1133 genetic architectures produce virtually identical molecules in bacterial symbionts of fungus-growing  
1134 ants. *Proceedings of the National Academy of Sciences of the United States of America*, 112(43),  
1135 13150–13154. <https://doi.org/10.1073/pnas.1515348112>
- 1136 Song, H., Wang, R., Wang, S., & Lin, J. (2005). A low-molecular-weight compound discovered through  
1137 virtual database screening inhibits Stat3 function in breast cancer cells. *Proceedings of the National*  
1138 *Academy of Sciences of the United States of America*, 102(13), 4700–4705.  
1139 <https://doi.org/10.1073/pnas.0409894102>
- 1140 Stubbendieck, R. M., Li, H., & Currie, C. R. (2019). Convergent evolution of signal-structure interfaces for  
1141 maintaining symbioses. *Current Opinion in Microbiology*, 50, 71–78.  
1142 <https://doi.org/10.1016/j.mib.2019.10.001>
- 1143 Suh, S. O., Marshall, C. J., McHugh, J. V., & Blackwell, M. (2003). Wood ingestion by passalid beetles in  
1144 the presence of xylose-fermenting gut yeasts. *Molecular Ecology*, 12(11), 3137–3145.  
1145 <https://doi.org/10.1046/j.1365-294X.2003.01973.x>
- 1146 Suh, S. O., McHugh, J. V., Pollock, D. D., & Blackwell, M. (2005). The beetle gut: A hyperdiverse source of  
1147 novel yeasts. *Mycological Research*, 109(3), 261–265. <https://doi.org/10.1017/S0953756205002388>
- 1148 Sumner, L. W., Amberg, A., Barrett, D., Beale, M. H., Beger, R., Daykin, C. A., Fan, T. W. M., Fiehn, O.,  
1149 Goodacre, R., Griffin, J. L., Hankemeier, T., Hardy, N., Harnly, J., Higashi, R., Kopka, J., Lane, A. N.,  
1150 Lindon, J. C., Marriott, P., Nicholls, A. W., ... Viant, M. R. (2007). Proposed minimum reporting  
1151 standards for chemical analysis: Chemical Analysis Working Group (CAWG) Metabolomics Standards  
1152 Initiative (MSI). *Metabolomics*, 3(3), 211–221. <https://doi.org/10.1007/s11306-007-0082-2>
- 1153 Taniguchi, M., Nagai, K., Watanabe, M., Niimura, N., Suzuki, K. I., & Tanaka, A. (2002). YM-181741, a  
1154 novel benz[a]anthraquinone antibiotic with anti-*Helicobacter pylori* activity from *Streptomyces* sp.  
1155 *Journal of Antibiotics*, 55(1), 30–25. <https://doi.org/10.7164/antibiotics.55.30>

- 1156 Thiele-Bruhn, S., & Peters, D. (2007). Photodegradation of pharmaceutical antibiotics on slurry and soil  
1157 surfaces. *Landbauforschung Volkenrode*, 57(1), 13–23.
- 1158 Tsugawa, H., Cajka, T., Kind, T., Ma, Y., Higgins, B., Ikeda, K., Kanazawa, M., Vanderghenst, J., Fiehn,  
1159 O., & Arita, M. (2015). MS-DIAL: Data-independent MS/MS deconvolution for comprehensive  
1160 metabolome analysis. *Nature Methods*, 12(6), 523–526. <https://doi.org/10.1038/nmeth.3393>
- 1161 Ulyshen, M. D. (2018). Ecology and conservation of Passalidae. In M. Ulyshen (Ed.), *Saproxylic Insects.*  
1162 *Zoological Monographs* (pp. 129–147). Springer, Cham. [https://doi.org/10.1007/978-3-319-75937-](https://doi.org/10.1007/978-3-319-75937-1_3)  
1163 [1\\_3](https://doi.org/10.1007/978-3-319-75937-1_3)
- 1164 Urakawa, A., Sasaki, T., Yoshida, K.-I., Otani, T., Lei, Y., & Yun, W. (1996). IT-143-A and B, Novel  
1165 Piericidm-group Antibiotics Produced by *Streptomyces* sp. *The Journal of Antibiotics*, 49(10), 1052–  
1166 1055.
- 1167 Urbina, H., Schuster, J., & Blackwell, M. (2013). The gut of Guatemalan passalid beetles: A habitat  
1168 colonized by cellobiose- and xylose-fermenting yeasts. *Fungal Ecology*, 6(5), 339–355.  
1169 <https://doi.org/10.1016/j.funeco.2013.06.005>
- 1170 Valenzuela-González, J. E. (1992). Adult-juvenile alimentary relationships in passalidae (Coleoptera). *Folia*  
1171 *Entomológica Mexicana*, 85, 25–37.
- 1172 Van Arnam, E. B., Currie, C. R., & Clardy, J. (2018). Defense contracts: Molecular protection in insect-  
1173 microbe symbioses. *Chemical Society Reviews*, 47(5), 1638–1651.  
1174 <https://doi.org/10.1039/c7cs00340d>
- 1175 Van Arnam, E. B., Ruzzini, A. C., Sit, C. S., Horn, H., Pinto-Tomás, A. A., Currie, C. R., & Clardy, J. (2016).  
1176 Selvamycin, an atypical antifungal polyene from two alternative genomic contexts. *Proceedings of the*  
1177 *National Academy of Sciences of the United States of America*, 113(46), 12940–12945.  
1178 <https://doi.org/10.1073/pnas.1613285113>
- 1179 Vargas-Asensio, G., Pinto-Tomas, A., Rivera, B., Hernandez, M., Hernandez, C., Soto-Montero, S., Murillo,  
1180 C., Sherman, D. H., & Tamayo-Castillo, G. (2014). Uncovering the cultivable microbial diversity of  
1181 costa rican beetles and its ability to break down plant cell wall components. *PLoS ONE*, 9(11),  
1182 e113303. <https://doi.org/10.1371/journal.pone.0113303>
- 1183 Wang, M., Carver, J. J., Phelan, V. V., Sanchez, L. M., Garg, N., Peng, Y., Nguyen, D. D., Watrous, J.,  
1184 Kaponov, C. A., Luzzatto-Knaan, T., Porto, C., Bouslimani, A., Melnik, A. V., Meehan, M. J., Liu, W. T.,  
1185 Crüsemann, M., Boudreau, P. D., Esquenazi, E., Sandoval-Calderón, M., ... Bandeira, N. (2016).  
1186 Sharing and community curation of mass spectrometry data with Global Natural Products Social  
1187 Molecular Networking. *Nature Biotechnology*, 34, 828–837. <https://doi.org/10.1038/nbt.3597>
- 1188 Wang, Q., & Xu, L. (2012). Beauvericin, a bioactive compound produced by fungi: A short review.  
1189 *Molecules*, 17, 2367–2377. <https://doi.org/10.3390/molecules17032367>
- 1190 Wicknick, J. A., & Miskelly, S. A. (2009). Behavioral interactions between non-cohabiting bess beetles,  
1191 *Odontotaenius disjunctus* (Illiger) (Coleoptera: Passalidae). *Coleopterists Bulletin*, 63(1), 108–116.  
1192 <https://doi.org/10.1649/0010-065X-63.1.108>

- 1193 Xu, F., Nazari, B., Moon, K., Bushin, L. B., & Seyedsayamdost, M. R. (2017). Discovery of a Cryptic  
1194 Antifungal Compound from *Streptomyces albus* J1074 Using High-Throughput Elicitor Screens.  
1195 *Journal of the American Chemical Society*, 139(27), 9203–9212. <https://doi.org/10.1021/jacs.7b02716>  
1196 Zimmermann, G. (1993). The entomopathogenic fungus *Metarhizium anisopliae* and its potential as a  
1197 biocontrol agent. *Pesticide Science*, 37(4), 375–379. <https://doi.org/10.1002/ps.2780370410>  
1198 Zizka, Z. (1998). Biological Effects of Macrotetrolide Antibiotics and Nonactic Acids. *Folia Microbiologica*,  
1199 43(1), 7–14.

1200

1201

## 1202 List of Figure Supplements

1203

1204 **Figure 4 - figure supplement 1:** Maximum-likelihood phylogenetic tree built using concatenated  
1205 sequences of four genes (16S rRNA, rpoB, gyrB, atpD). Bootstrap support values (in percentage) are based  
1206 on 1,000 replicates (numbers in blue). Branches in red highlight the three major clades: *S. padanus*, *S.*  
1207 *cellostaticus* and *S. scopuliridis*. Leaf labels represent the strain code. The outgroup (*Mycobacterium*  
1208 *tuberculosis* H37RV) was manually removed and the branch length information was not incorporated into  
1209 the tree to facilitate visualization of the bootstrap values.

1210

1211 **Figure 4 - figure supplement 2:** Tanglegram analysis comparing phylogenetic (left) and metabolic (right)  
1212 information of *Streptomyces* strains associated with *O. disjunctus* shows chemo-evolutionary relationships  
1213 among strains. The maximum-likelihood phylogenetic tree was built using concatenated sequences of four  
1214 genes (16S rRNA, rpoB, gyrB, atpD). The chemical dissimilarity dendrogram was generated using  
1215 hierarchical cluster analysis on the presence and absence of ~19,000 chemical features detected in an  
1216 untargeted metabolomics analysis of culture extracts, using Jaccard distance and UPGMA as the  
1217 agglomeration method. Lines connects the same strains; orange boxes highlight the *S. padanus* clade; blue  
1218 boxes highlight the *S. cellostaticus* clade; pink boxes highlight the *S. scopuliridis* clade; green boxes  
1219 highlight smaller clades that were seen in both sides of the tanglegram.

1220

1221 **Figure 4 - figure supplement 3:** Heatmap showing the distance in kilometers (in log<sub>10</sub> scale) between the  
1222 geographical origin of *Streptomyces* strains associated with *O. disjunctus* galleries. Branches in red  
1223 highlight the three major clades: *S. padanus*, *S. cellostaticus* and *S. scopuliridis*. Leaf labels represent the  
1224 strain code.

1225

1226 **Figure 4 - figure supplement 4:** Heatmap showing the distance in degrees of latitude between the  
1227 geographical origin of *Streptomyces* strains associated with *O. disjunctus* galleries. Branches in red  
1228 highlight the three major clades: *S. padanus*, *S. cellostaticus* and *S. scopuliridis*. Leaf labels represent the  
1229 strain code.

1230

1231 **Figure 4 - figure supplement 5:** Heatmap showing the distance in degrees of longitude between the  
1232 geographical origin of *Streptomyces* strains associated with *O. disjunctus* galleries. Branches in red  
1233 highlight the three major clades: *S. padanus*, *S. cellostaticus* and *S. scopuliridis*. Leaf labels represent the  
1234 strain code.

1235

1236 **Figure 4 - figure supplement 6:** Maximum-likelihood phylogenetic tree built using the 16S rRNA gene  
1237 sequence including duplicated strains, annotated with compounds produced by each microbial strain and  
1238 their geographic and source origin (both represented by rings around the tree). Scale bar represents branch  
1239 length in number of substitutions per site. The outgroup (*Mycobacterium tuberculosis* H37RV) was removed  
1240 manually from the tree to facilitate visualization. Leaf labels represent the strain code. Branches in red  
1241 highlight the three major clades: *S. padanus*, *S. cellostaticus* and *S. scopuliridis*. Leaf labels represent the  
1242 strain code. Act: actinomycins. Ang: angucylinones. Atm: antimycins. Baf: bafilomycins. Chx:



1243 cycloheximide. Fil: filipins. Nac: nactins. Ngn: nigericin. Nov: novobiocin. Pcd: Piericidin. Ptm: polycyclic  
1244 tetramate macrolactams. Sur: Surugamides.

1245  
1246 **Figure 4 - figure supplement 7:** Maximum-likelihood phylogenetic tree built using the 16S rRNA gene  
1247 sequence of *Streptomyces* strains isolated from *O. disjunctus* and soil. Bootstrap support values (in  
1248 percentage) are based on 1,000 replicates (numbers in blue, only values above 80% are displayed).  
1249 Branches in red highlight the three major clades: *S. padanus*, *S. cellostaticus* and *S. scopuliridis*. Leaf labels  
1250 represent the strain code. The outgroup (*Mycobacterium tuberculosis* H37RV) was manually removed and  
1251 the branch length information was not incorporated into the tree to facilitate visualization of the bootstrap  
1252 values.

1253  
1254 **Figure 4 - figure supplement 8:** Maximum-likelihood phylogenetic tree built using the 16S rRNA gene  
1255 sequence of *Streptomyces* strains isolated from *O. disjunctus*, tropical passalid beetles, termites,  
1256 bees/wasps/ants and soil. Scale bar represents branch length in number of substitutions per site. Leaf  
1257 labels represent the strain code. The outgroup (*Mycobacterium tuberculosis* H37RV) was removed  
1258 manually from the tree to facilitate visualization. Branches in red highlight the three major clades: *S.*  
1259 *padanus*, *S. cellostaticus* and *S. scopuliridis*.

1260  
1261 **Figure 5 - figure supplement 1:** Other compound combinations used in the compound interaction assay.  
1262 Bars represent means (+SD) of percent of growth inhibition (sample size: seven independent biological  
1263 replicates). Statistical significance was measured using a t-test (\*\*\*\*:  $p < 0.0001$ ; \*\*:  $p = 0.009$ ). Numbers at  
1264 the X axis represent the tested concentration of each compound in  $\mu\text{g/mL}$  (F: filipins. A: actinomycin X2. N:  
1265 nactins. S: STA-21). *b*: Bliss excess.  $E_{AB, BLISS}$ : expected value for an independent (additive) interaction  
1266 between two compounds according to the Bliss Independence model. ActX2: actinomycin X2.

1267  
1268 **Figure 6 - figure supplement 1:** All microbes used in the interaction on frass assay were able to use the  
1269 frass material as a substrate for growth. Bars represent means (+SD) of fold change in growth of each  
1270 microbe in microtubes with and without frass material after seven days of incubation (compared to the initial  
1271 inoculum; sample size: eight independent biological replicates). Met P016: *M. anisopliae* P016; Met P287:  
1272 *M. anisopliae* P287; Pad: *S. padanus* P333; Cal: *S. californicus* P327; Scp: *S. scopuliridis* P239.

1273  
1274 **Figure 6 - figure supplement 2:** EIC of some specialized metabolites detected in treatments containing  
1275 *M. anisopliae* P016. \*Standard: a mixture of crude ethyl acetate extracts of ISP2-solid cultures of the three  
1276 streptomycetes. Pad: *S. padanus* P333. Cal: *S. californicus* P327. Scp: *S. scopuliridis* P239. Met: *M.*  
1277 *anisopliae*. ActX: actinomycin X2. FilIII/IV: filipins III and IV. Monac: monactin. AlterB: alteramide B.

1278  
1279 **Figure 6 - figure supplement 3:** EIC of some specialized metabolites detected in treatments containing  
1280 streptomycetes only. Note that the absolute intensity of the peaks change depending on the combination  
1281 of microbes. \*Standard: a mixture of crude ethyl acetate extracts of ISP2-solid cultures of the three  
1282 streptomycetes. Pad: *S. padanus* P333. Cal: *S. californicus* P327. Scp: *S. scopuliridis* P239. ActX:  
1283 actinomycin X2. FilIII/IV: filipins III and IV. Monac: monactin. AlterB: alteramide B. Please note that  
1284 compound STA-21, produced by Scp, was already present at a low intensity in the frass material since it is  
1285 an extremely common compound in this environment, therefore, it was detected in all the treatments. We  
1286 used the intensity observed in the treatment Pad+Cal as its baseline intensity present in the frass prior to  
1287 the treatments. Note that its intensity in the treatment Pad+Scp is very close to the baseline, whereas its  
1288 intensity in the treatment Cal+Scp is similar to the one observed for Scp alone.

## 1289 1290 List of Appendix Figures

1291  
1292  
1293 **Appendix 1 – Figure 1:** Extracted ion chromatogram (EIC, showing retention time) and MS2 spectra of  
1294 each compound annotated at identification level 1 (Actinomycin D, Actinomycin X2, STA-21, Rubiginone  
1295 B2, Cycloheximide, Nonactin, Monactin, Dinactin, Trinactin, Tetranactin, Filipin I, Filipin II, Filipin III,  
1296 Antimycin A, Nocardamine, Bafilomycin A1, Bafilomycin B1, Novobiocin, Piericidin A, Nigericin,  
1297 Beauvericin), comparing a commercial standard (top) to the culture extract of an exemplary microbe or  
1298 environmental frass extract (bottom).

1299  
1300 **Appendix 1 - Figure 2:** MS2 spectra of each compound annotated at identification level 2 (Alteramide A,  
1301 Alteramide B, Surugamide A), comparing a spectrum detected in the culture extract of an exemplary  
1302 microbe (top) to a publicly available spectrum on the MassIVE repository (bottom). Publicly available  
1303 spectra can be found at: Alteramide A, Alteramide B:  
1304 f.MSV000079516/ccms\_peak/Labelled/R5\_lab\_J1074\_pre.mzXML; Surugamide A: f.MSV000079519/  
1305 ccms\_peak/Unlabelled/A1\_unlab\_J1074\_pre.mzXML (accessed on June/2020).

1306  
1307 **Appendix 1 - Figure 3:** MS2 spectrum of each compound putatively annotated at identification level 3  
1308 (Filipin IV, Fungichromin), detected in the culture extract of an exemplary microbe. Annotations were made  
1309 based on fragmentation similarities with other analogs of the same family annotated at identification level 1  
1310 (filipins I-III).

1311  
1312 **Appendix 1 - Figure 4:** Three exemplary total ion chromatograms (TIC) of the LC-MS/MS analysis  
1313 performed on environmental samples (**A**: pupal chamber material; **B**, **C**: old frass), plus the extracted ion  
1314 chromatogram (EIC) of an exemplary compound detected in each sample. The MS1 spectrum refers to the  
1315 main peak detected on each EIC, highlighting two adducts of each compound.

1316  
1317 **Appendix 1 - Figure 5:** Strains of *Streptomyces padanus* were isolated from 19/22 of the sampled *O.*  
1318 *disjunctus* galleries. **A**) *S. padanus* P333 growing on an ISP2-agar plate after seven days of incubation at  
1319 30°C. **B**) Galleries that *S. padanus* was isolated from.

1320  
1321 **Appendix 1 - Figure 6:** Average coverage distribution of *Streptomyces*-derived genes identified in the  
1322 metagenome of the different gut compartments of *O. disjunctus*. The figure shows the prevalence of the  
1323 *Streptomyces*-derived genes in all four gut compartments with significantly higher normalized-coverage in  
1324 the posterior hindgut (PHG), the region where frass is compacted prior to its excretion. In each boxplot, a  
1325 point represents a single gene per category and its detected coverage, and the diamond symbols represent  
1326 the mean. The box boundaries represent the first and third quartiles of the distribution and the median is  
1327 represented as the horizontal line inside each box. Boxplots whiskers span 1.5 times the interquartile range  
1328 of the distribution. FG = Foregut, MG = Midgut, AHG = Anterior Hindgut. Statistical differences were  
1329 evaluated with Kruskal-Wallis test and pairwise comparisons were done using a two-sided Wilcoxon test with  
1330 P-values adjusted using the Benjamini-Hochberg method. Contigs and RPKM-normalized coverage data  
1331 reported in Ceja-Navarro *et al.* (2019) were used to generate this figure. Contigs were aligned against the  
1332 NCBI non-redundant database using the DIAMOND software (Buchfink *et al.*, 2014) and the “long reads”  
1333 option. The obtained alignment was imported into MEGAN (Huson *et al.*, 2018) and the taxonomy assigned  
1334 using MEGAN’s LCA algorithm for long reads. Coverage data across the four regions of *O. disjunctus*’ gut  
1335 was retrieved for contigs identified as taxonomically-derived from *Streptomyces* sp.

1336  
1337 **Appendix 1 - Figure 7:** *Metarhizium anisopliae* strains P016 and P287 phenotypes after 10 days growing  
1338 on PDA plates incubated at 25°C under constant light. Magnification: 7x.

1339  
1340  
1341 **List of Source Data Files**

1342  
1343 **Figure 5 - Source Data 1:** *M. anisopliae* P237 growth inhibition (in percent) in each one of the replicates  
1344 of the compound interactions assay. F: filipins. A: actinomycin X2. N: nactins. S: STA-21.

1345  
1346 **Figure 6 - Source Data 1:** Growth in fold change of each microbe in each one of the treatments tested in  
1347 the competition in frass assay. Pad: *S. padanus* P333. Cal: *S. californicus* P327. Scp: *S. scopuliridis* P239.  
1348 Met: *M. anisopliae*. Strept: *Streptomyces*.
